# Supplementary material for: Thermally stimulated cascade reaction polymer membranes: a promising strategy for an increased hydrogen and propylene purification performance
Source: Royal Society of Chemistry journal article supplement (doi:10.1039/d2py00712f), 2022-10-14
Supplement: d2py00712f1.pdf [file d2py00712f1.pdf]

Electronic Supplementary Information

**Thermally Stimulated Cascade Reaction Polymer Membranes: A Promising Strategy for an increased Hydrogen and Propylene Purification Performance**

**Authors:** David Meis, Silvio Neumann, Sergey Shishatskiy, Ulrike Meis, Volkan Filiz

**Affiliations:**

Helmholtz-Zentrum Hereon, Institute of Membrane Research, Max-Planck-Str.1, 21502 Geesthacht, Germany

\*Email: volkan.filiz@hereon.de

**Table of Content**

|                                                                    |    |
|--------------------------------------------------------------------|----|
| Polymer Synthesis                                                  | 2  |
| Polymer Characterization                                           | 3  |
| Structure Characterization of $\beta$ Mallyloxy-modified Backbones | 6  |
| Structure Characterization of annealed $\beta$ MPI-1               | 6  |
| Thermal Characterization of $\beta$ Mallyloxy-modified Backbones   | 12 |
| X-Ray Diffraction Spectroscopy (XRD)                               | 17 |
| Gas Performance by means of Time-Lag Measurements                  | 18 |
| Computational Chemistry                                            | 26 |
| <i>Quantum mechanical Simulation</i>                               | 26 |
| <i>Molecular Modelling</i>                                         | 30 |
| References                                                         | 38 |

## Polymer Synthesis

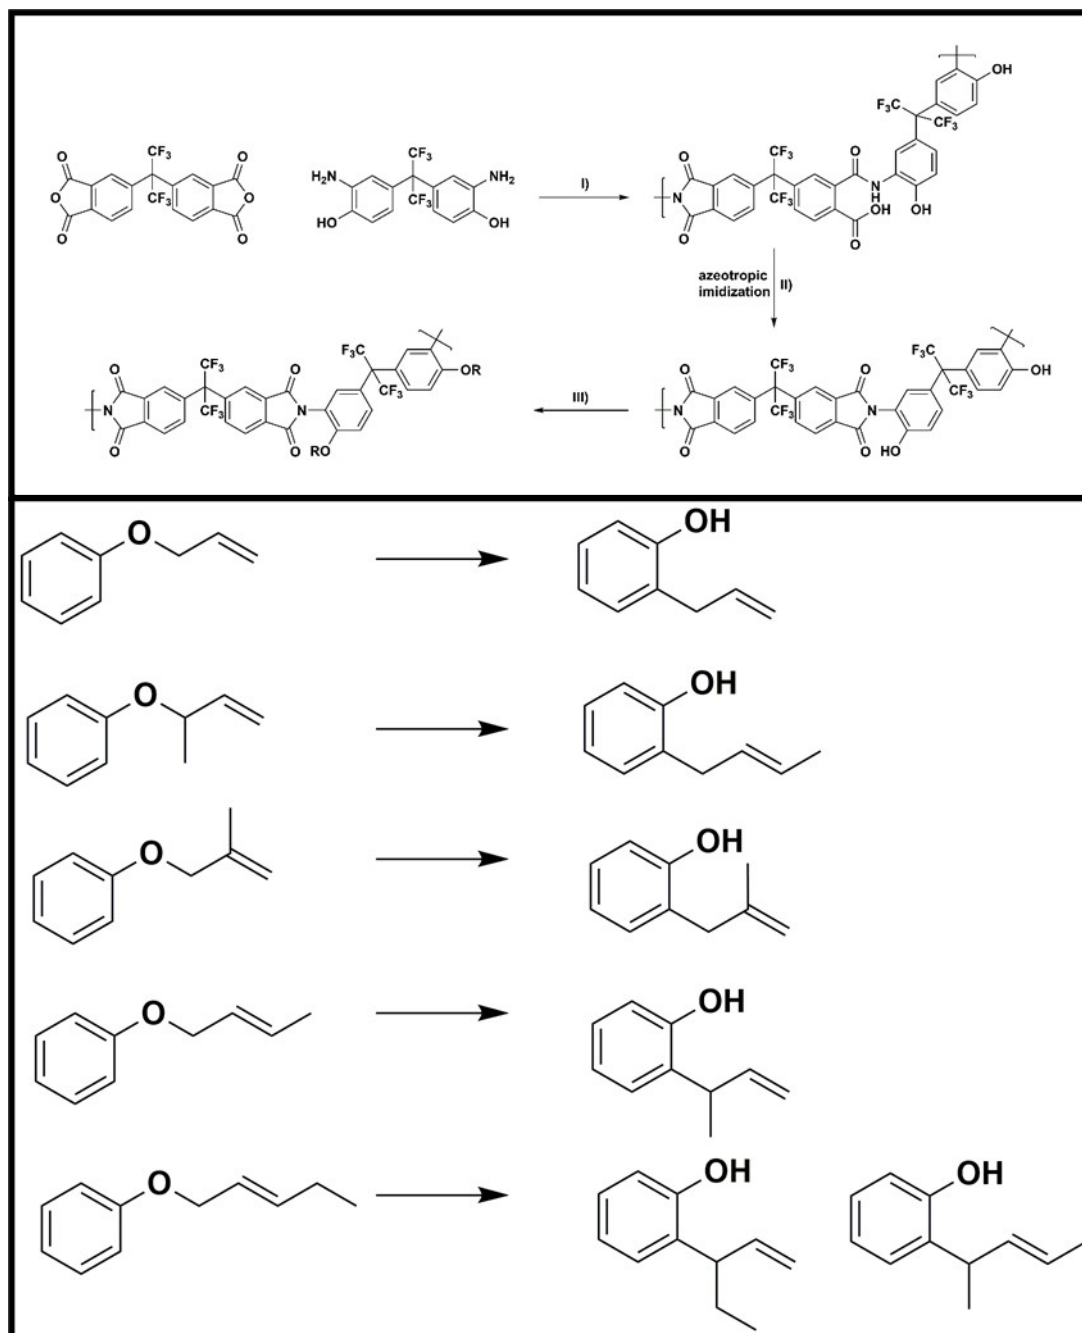

**Scheme S1.** Synthesis route for the polymerization, imidization and allylation. (I) Polyamic acid formation, (II) azeotropic imidization at 180 °C with *o*-xylene, (III) *ortho*-hydroxy group conversion. Overview of the formed structures after the Claisen-Rearrangement.

## Polymer Characterization

### Polymer characterization methods

The polymers were characterized by  $^1\text{H}$ -Nuclear Magnetic Resonance (NMR) spectroscopy employing a Bruker AVIIIHD spectrometer at 500 MHz ( $^1\text{H}$ -NMR), with deuterated dimethyl sulfoxide ( $\text{DMSO-d}_6$ ) as the solvent and lock signal. Tetramethylsilane (TMS) was used as a reference signal.

The standard-equivalent molecular weights of the functionalized polyimides was determined by gel permeation chromatography (GPC) based on standard polystyrene calibration using the PSS ReadyCal-Kits Poly(Styrene) pskitr4-12 with a molar mass range from  $M_p$  474 - 2 520 000 Da, in dimethylacetamide (DMAc) with the addition of lithium chloride ( $2.12 \text{ g L}^{-1}$ ) as the eluent in each measurement. A Waters 717plus instrument equipped with PSS GRAM columns [GRAM pre-column (dimension 8 – 50 mm) and two GRAM columns of different porosity (3000 Å and 1000 Å, respectively) with dimension of 8 · 300 mm and particle size of 10  $\mu\text{m}$ . The flow rate was  $1,0 \text{ mL min}^{-1}$  using a VWR-Hitachi 2130 pump, and a Shodex RI-101 differential refractive index detector was used.

Attenuated total internal reflectance - Fourier transform infrared spectroscopy (ATR-FTIR) measurements were performed using a Bruker alpha ATR in a spectral range of  $400\text{-}4000 \text{ cm}^{-1}$  with an accumulation of 32 scans and a resolution of  $4 \text{ cm}^{-1}$ .

Differential scanning calorimetry (DSC) was performed with a differential scanning calorimeter DSC1 (Mettler-Toledo) in a temperature range between 30 and  $450 \text{ }^\circ\text{C}$  under nitrogen ( $60 \text{ mL min}^{-1}$ ) and at a heating rate of  $5 \text{ }^\circ\text{C min}^{-1}$  to study the thermally induced transitions of the synthesized polyimides. Approximately 8 mg of the polymer sample were transferred into a  $40 \mu\text{L}$  sealed aluminum pan with a pierced lid. For the glass transition determination, the materials were heated up to  $300 \text{ }^\circ\text{C}$  and held for 30 min, and cooled down afterwards at a heating rate of 5 and cooling rate of  $10 \text{ }^\circ\text{C min}^{-1}$ . The glass transition was determined during the second cycle. All measured heat flows are weight-normalized.

Thermogravimetric analysis (TGA) was performed using a TGA-DSC2 Thermogravimetric Analyzer (Mettler-Toledo) over the range of 25 to 800 °C with a heating rate of 5 °C min<sup>-1</sup> in an argon atmosphere (both with a flow rate of 20 mL min<sup>-1</sup>). In order to determine the CO<sub>2</sub> as well as other volatile products evolution during TR-process, the thermogravimetric analyzer was coupled with a FTIR spectrometer Nicolet iS50 (Thermo Scientific), which recorded in the spectral range of 400-4000 cm<sup>-1</sup> with a resolution of 4 cm<sup>-1</sup> and a total number of 64 scans per spectrum. The conversion of the Thermal Rearrangement process for each material after different isothermal treatments was obtained by performing TGA runs of these materials. Afterwards the mass loss of the corresponding mass loss step, in the temperature range between the determined onset- and offset-temperature, was measured. With this experimental mass loss, the conversion was calculated according to the following equation:

$$\text{conversion (\%)} = \frac{\text{mass loss}_{\text{experimental}}}{\text{mass loss}_{\text{theoretical}}} \times 100 \quad (\text{eq. S1})$$

The density of the membranes was determined by using a Mettler Toledo XP105 balance equipped with a density determination kit. The samples were weighed in air and isooctane according to the buoyancy method. Isooctane has been chosen as a liquid with known density since it is wetting the membrane perfectly and is not absorbing into the membrane. The density was calculated using the following equation (eq. S2)

$$\rho_{\text{membrane}} = \frac{w_{\text{air}}}{w_{\text{air}} - w_{\text{liq}}} \rho_{\text{liq}} \quad (\text{eq. S2})$$

with  $\rho_{\text{membrane}}$  as the membrane density (g cm<sup>-3</sup>),  $w_{\text{air}}$  and  $w_{\text{liq}}$  as the weight of the membrane in air and isooctane (g), and  $\rho_{\text{liq}}$  is the density of isooctane (g cm<sup>-3</sup>).

Based on the density data, the fractional free volume (FFV) of the membranes before the thermal treatments was estimated according to the following equation (eq. S3)

$$V_{sp} = \frac{m}{\rho_{\text{membrane}}} \quad (\text{eq.S3})$$

$$FFV = \frac{V_{sp} - 1.3xV_w}{V_{sp}} \quad (\text{eq. S4})$$

Where  $V_{sp}$  is the specific molar volume of the polymer membrane and  $V_w$  is the van der Waals molar volume according to Bondi's group contribution theory [1, 2].

X-ray diffraction measurements of the membranes were done using a Siemens D5000 diffractometer with a Cu K $\alpha$  radiation with a wavelength of 0.154 nm at a step size of 0.1° min<sup>-1</sup> and a step time of 4 s in the 2 $\theta$  range of 2 - 50°. The average d-spacing value was calculated via Bragg's equation:

$$2d\sin\theta = n\lambda \quad (\text{eq. S5})$$

The gas permeation properties were determined using a constant volume variable pressure method (time-lag method) realized in an in-house designed and built experimental facility [3]. The single gas permeability  $P$  of H<sub>2</sub>, He, N<sub>2</sub>, O<sub>2</sub>, CH<sub>4</sub>, CO<sub>2</sub>, C<sub>2</sub>C<sub>4</sub>, C<sub>2</sub>C<sub>6</sub>, C<sub>3</sub>C<sub>6</sub>, C<sub>3</sub>C<sub>8</sub> was measured at 30 °C and a feed pressure of 1000 mbar. From the linear increase of the downstream pressure rise as a function of the time (dp/dt) the permeability of each gas could be calculated with the equation:

$$P = \frac{273.15Vldp}{76T\Delta pA dt} \quad (\text{eq. S6})$$

with permeability  $P$  (Barrer), membrane thickness  $l$  (cm) (see Table S1), downstream chamber volume  $V$  of 43.3 cm<sup>3</sup> temperature  $T$  of 303 K, pressure difference  $dp$  ( $=p_{\text{upstream}} - p_{\text{downstream}}$ ) (cm Hg) and effective membrane area  $A$  of 1.22cm<sup>2</sup>. Based on the calculated permeability of each gas, the ideal selectivity  $\alpha_{x/y}$  of each gas pair could be calculated, as shown in equation S7

$$\alpha_{x/y} = \frac{P_x}{P_y} \quad (\text{eq. S7})$$

The diffusion coefficients were obtained from these steady-state measurements by determination of the diffusional time-lag  $\theta$ . The time-lag is determined by the intersection of time-axis and tangent of the steady-state range. By means of equation S8, the diffusion coefficient  $D$  was calculated:

$$\theta = \frac{l^2}{D} \quad (\text{eq. S8})$$

### Claisen Rearrangement mechanism

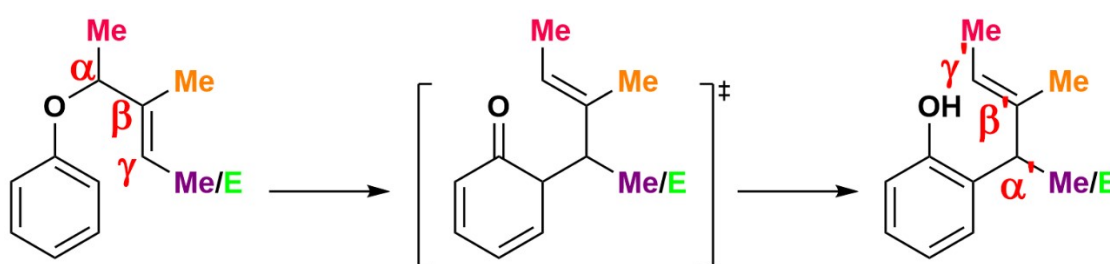

**Scheme S2.** Claisen Rearrangement mechanism.

### Structure Characterization of annealed $\beta$ MPI-1

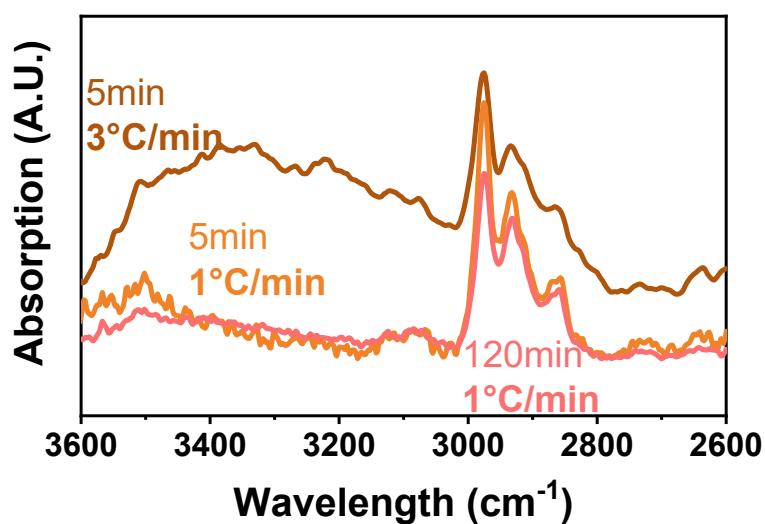

**Figure S1.** FT-IR spectrum of the annealed samples of  $\beta$ MPI-1 after annealing at 300 °C with a heating rate of 3 °C/min and 1 °C/min, and a sample that was heated with a heating rate of 1 °C/min and an isothermal treatment for 2 h.

### Structure Characterization of $\beta$ Mallyoxy-modified Backbones

*$\beta$ M-PI-1*

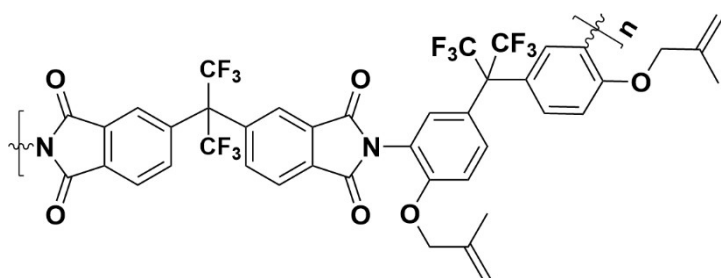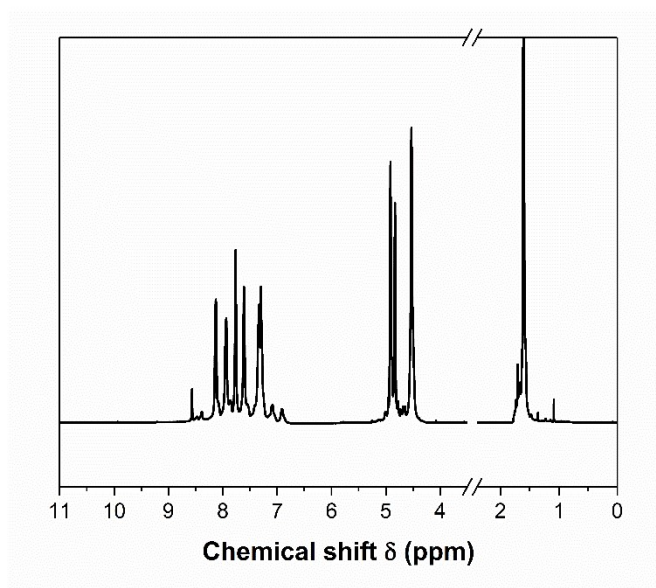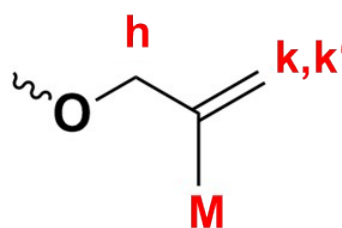

**Figure S2.** <sup>1</sup>H-NMR spectrum  $\beta$ M-PI.

Molecular weight:  $M_n$  (g/mol), =  $2.47 \cdot 10^4$ ,  $M_w$  (g/mol), =  $9.91 \cdot 10^4$ ,  $\bar{D} = 4.0$ . IR: 3082 (w, C-H str., alkene); 2925 (w, C-H str., alkane, methyl); 2875 (w, C-H str., alkane, methylene); 1789 (s, C=O str, imide); 1725 (w, C=O str, imide); 1615 (w, C=C str., alkene); 1273,1205 (s, C-O-C str., ether). <sup>1</sup>H NMR (DMSO-d<sub>6</sub>, ppm); For specific assignments see Figure S2: 7.3-8.2 (m, 12 H, aromatic, **a-f**); 4.8-4.9 (m, 4 H, vinyl, **k,k'**); 4.5 (s, 4 H, allylic, **h**); 1.6 (s, 6 H, allylic, **M**).

$\beta$ M-PI-2

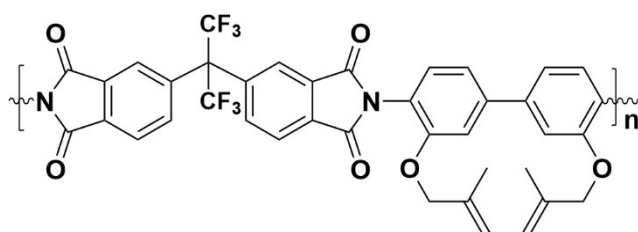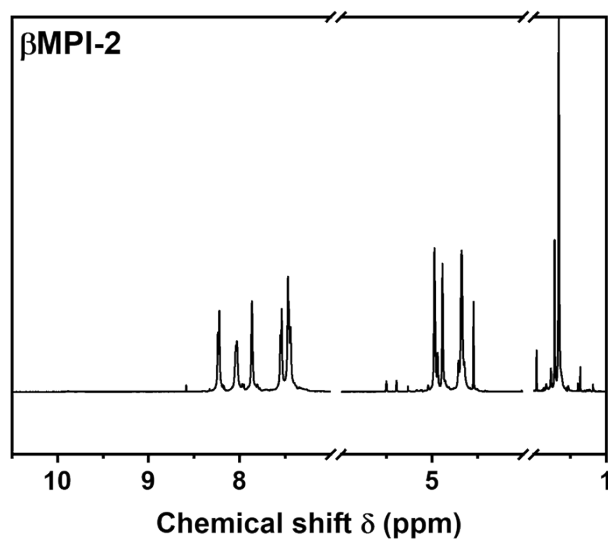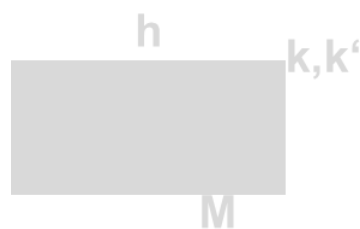

**Figure S3.**  $^1\text{H-NMR}$  spectrum  $\beta\text{M-PI-3}$ .

Molecular weight:  $M_n$  (g/mol), =  $2.92 \cdot 10^4$ ,  $M_w$  (g/mol), =  $8.13 \cdot 10^4$ ,  $D = 2.78$ .  $^1\text{H NMR}$  (DMSO- $d_6$ , ppm); For specific assignments see Figure S3: 7.3-8.4 (m, 12 H, aromatic); 4.9-5.1 (m, 4 H, vinyl,  $\mathbf{k, k'}$ ); 4.6 (s, 4 H, allylic,  $\mathbf{h}$ ); 1.6 (s, 6 H, allylic,  $\mathbf{M}$ ).



$\beta$ M-PI-3

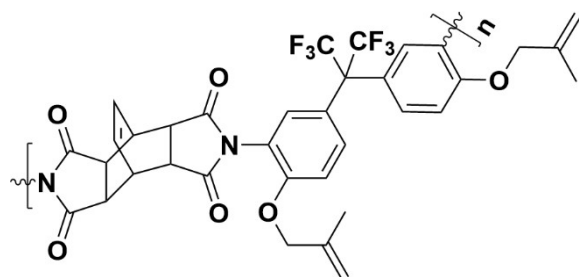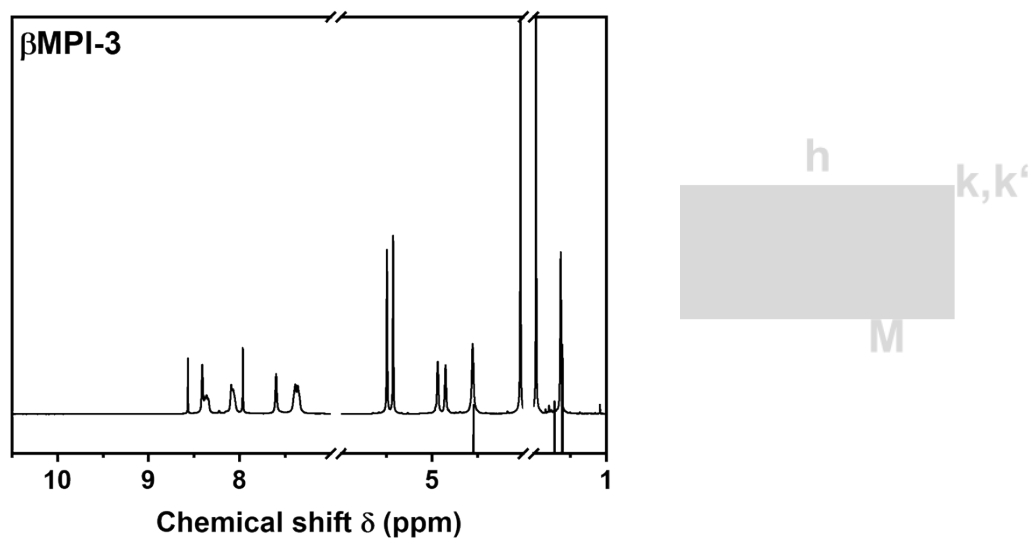

**Figure S4.**  $^1\text{H-NMR}$  spectrum  $\beta$ M-PI-2.

Molecular weight:  $M_n$  (g/mol), =  $1.29 \cdot 10^4$ ,  $M_w$  (g/mol), =  $5.58 \cdot 10^4$ ,  $D = 4.31$ .  $^1\text{H NMR}$  (DMSO- $d_6$ , ppm); For specific assignments see Figure S4: 7.3-8.2 (m, 6 H, aromatic); 5.4-5.6 (m, 2 H, vinyl anhydride); 4.8-4.9 (m, 4 H, vinyl, **k,k'**); 4.6 (s, 4 H, allylic, **h**); 2.0 (s, 2 H, xxx); 1.6 (s, 6 H, allylic, **M**).

$\beta$ M-PI-4

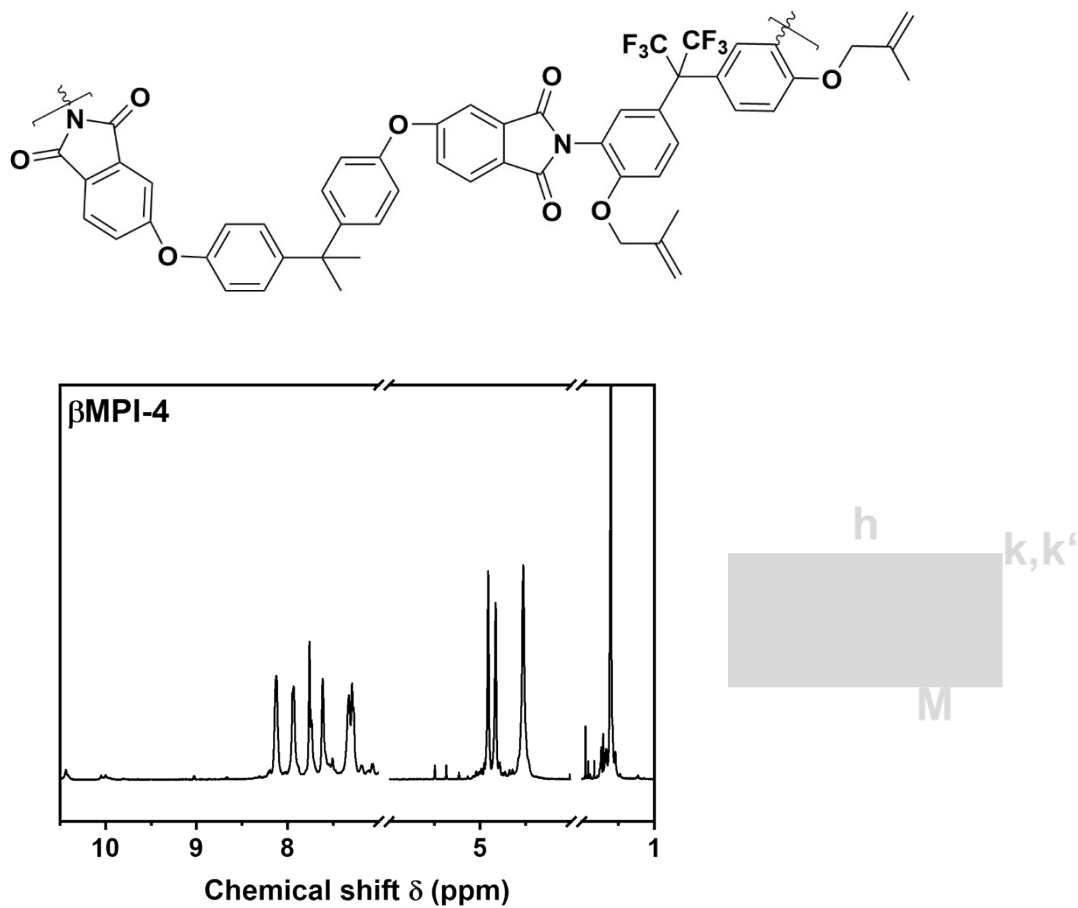

**Figure S5.**  $^1\text{H-NMR}$  spectrum  $\beta$ M-PI-4.

Molecular weight:  $M_n$  (g/mol), =  $3.37 \cdot 10^4$ ,  $M_w$  (g/mol), =  $6.80 \cdot 10^4$ ,  $\bar{D} = 2.02$ .  $^1\text{H NMR}$  (DMSO- $d_6$ , ppm); For specific assignments see Figure S5: 7.3-8.2 (m, 20 H, aromatic); 4.8-4.9 (m, 4 H, vinyl, **k,k'**); 4.5 (s, 4 H, allylic, **h**); 1.6 (s, 6 H, allylic, **M**).

$\beta$ M-PI-5

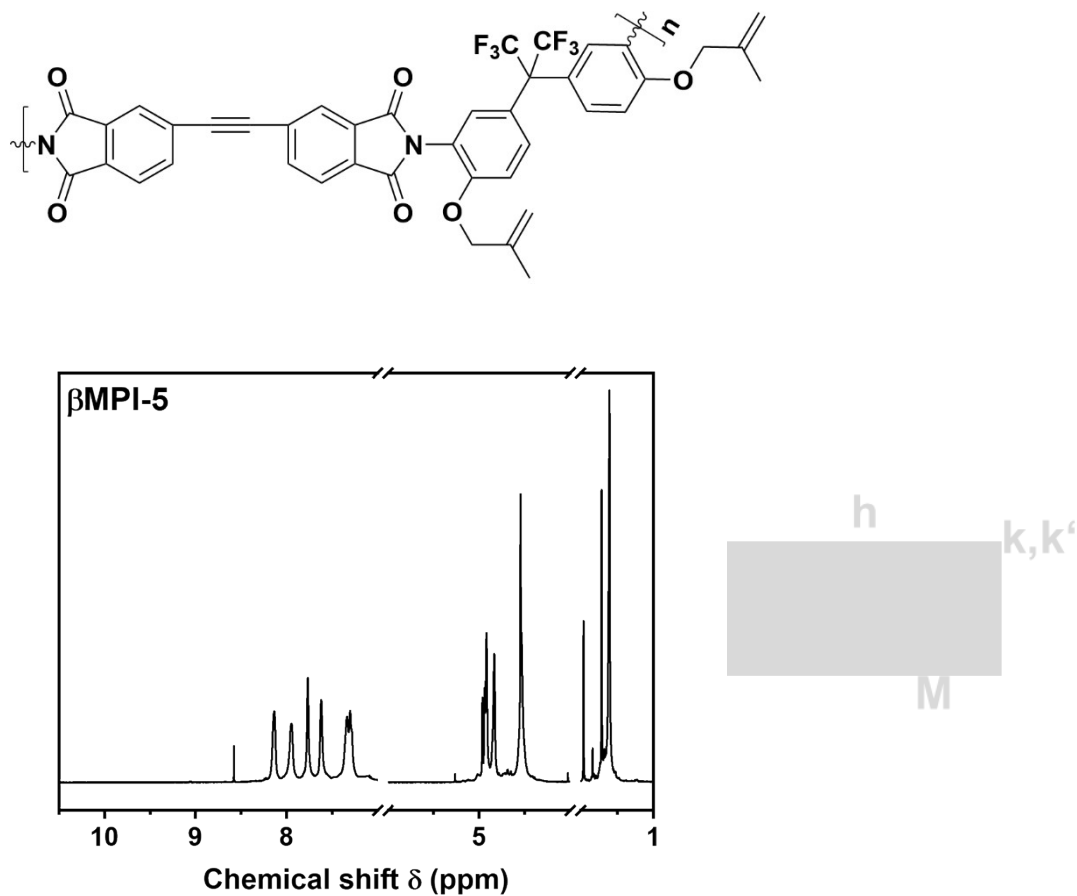

**Figure S6.**  $^1\text{H-NMR}$  spectrum  $\beta$ M-PI-5.

Molecular weight:  $M_n$  (g/mol),  $3.79 \cdot 10^4$ ,  $M_w$  (g/mol),  $= 16.9 \cdot 10^4$ ,  $D = 4.49$ .  $^1\text{H NMR}$  (DMSO- $d_6$ , ppm); For specific assignments see Figure S6: 7.3-8.2 (m, 12 H, aromatic, **a-f**); 4.8-4.9 (m, 4 H, vinyl, **k,k'**); 4.5 (s, 4 H, allylic, **h**); 1.6 (s, 6 H, allylic, **M**).

## Thermal Characterization of $\beta$ Mallyloxy-modified Backbones

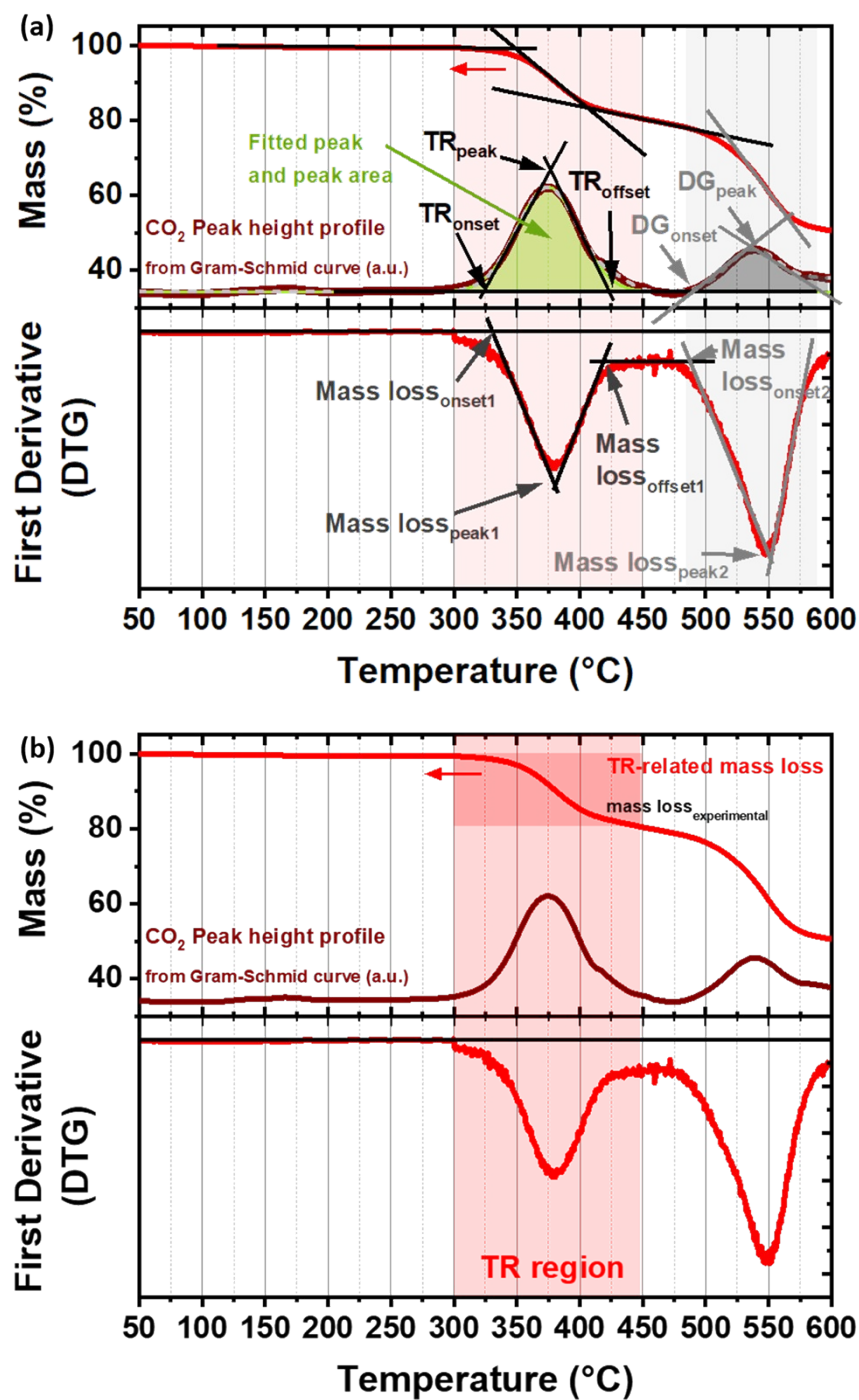

**Figure S7.** (a) Determination of the TR and degradation (DG) specific onset, peak and offset temperature, as well as the mass loss onset, peak and offset temperature of the first and

second mass loss corresponding process. (b) TGA-mass loss curve, its first derivative (DTG) and extracted CO<sub>2</sub> peak height profile, including the region of the determined experimental mass loss for the TR conversion calculation.

Residual mass loss in the TR region is divided by the theoretical mass loss of 2 molecules of CO<sub>2</sub> per repetition unit, as expected for a quantitative PBO conversion, yields the TR conversion.

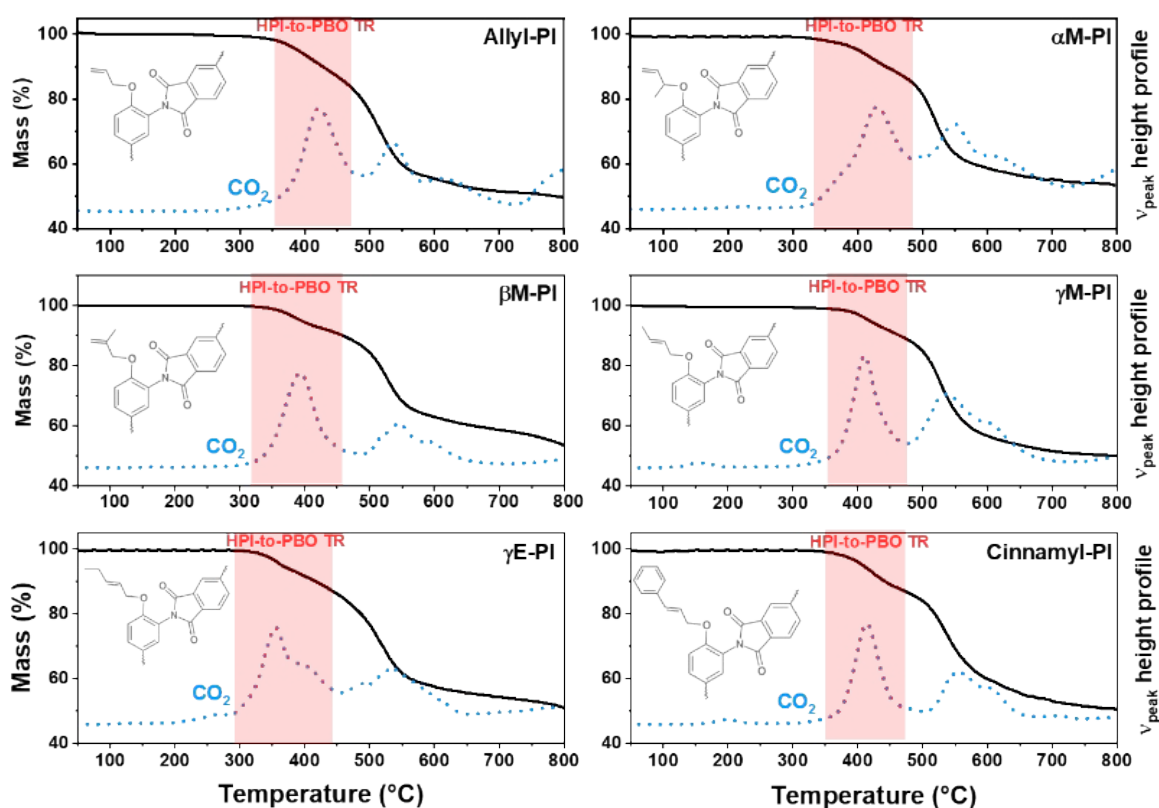

**Figure S8.** Mass loss curves (black) and CO<sub>2</sub> peak height profiles (blue) measured by DSC for all Claisen Rearrangement undergoing polymers.

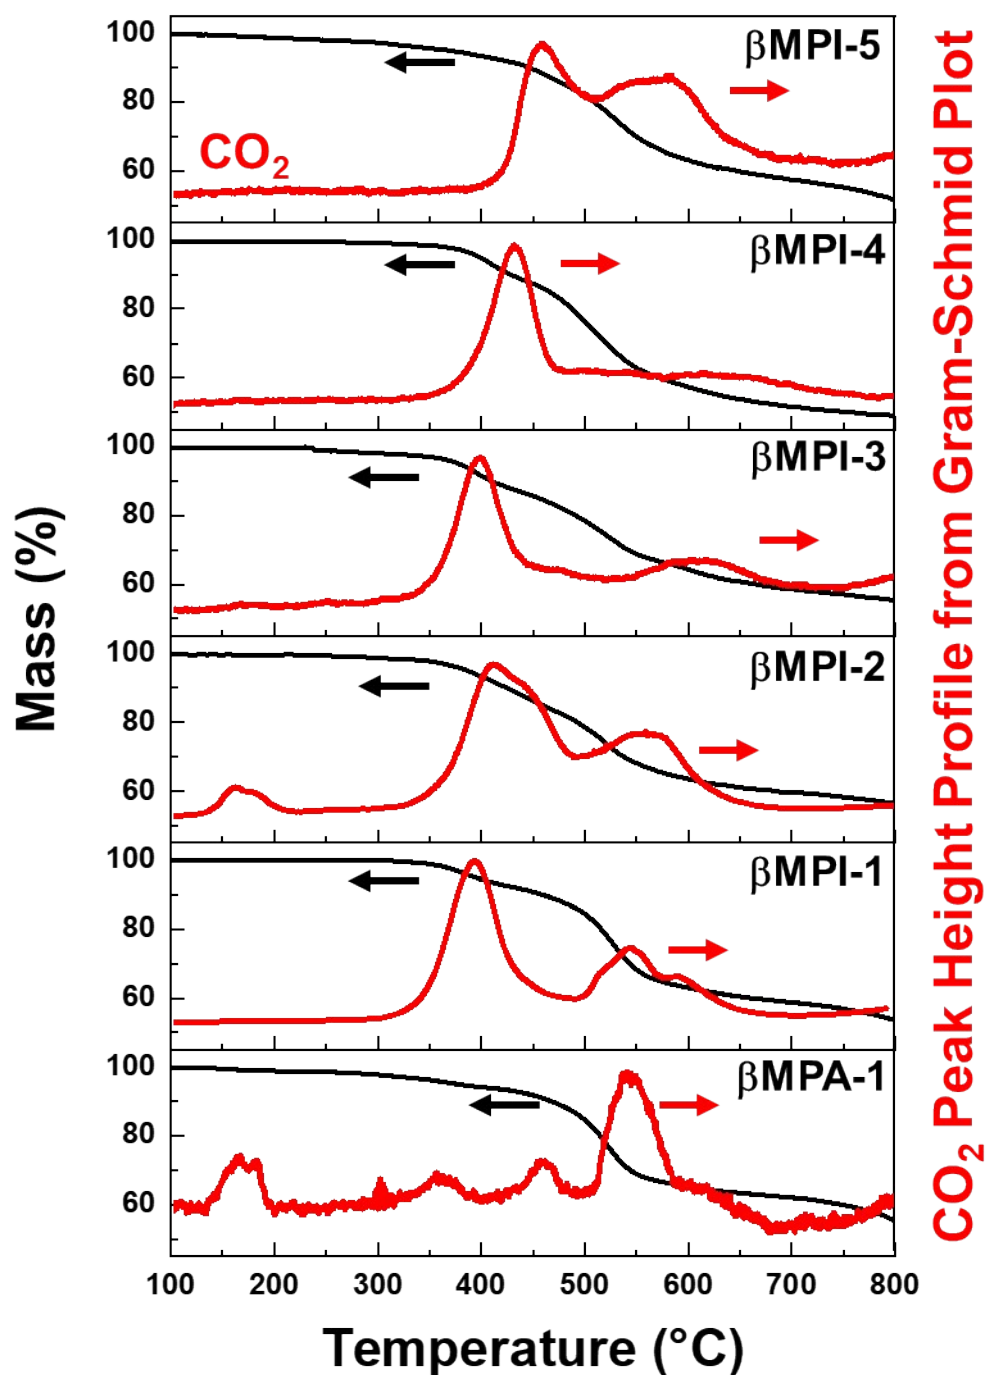

**Figure S9.** TGA based mass loss curves (black) and  $\text{CO}_2$  peak height profile, determined by evolved decomposition gas analysis via FT-IR spectroscopy (red) of  $\beta$ Mallyloxy-modified polyamide  $\beta$ MPA-1 and polyimide  $\beta$ MPI-1, -2, -3, -4, and -5.

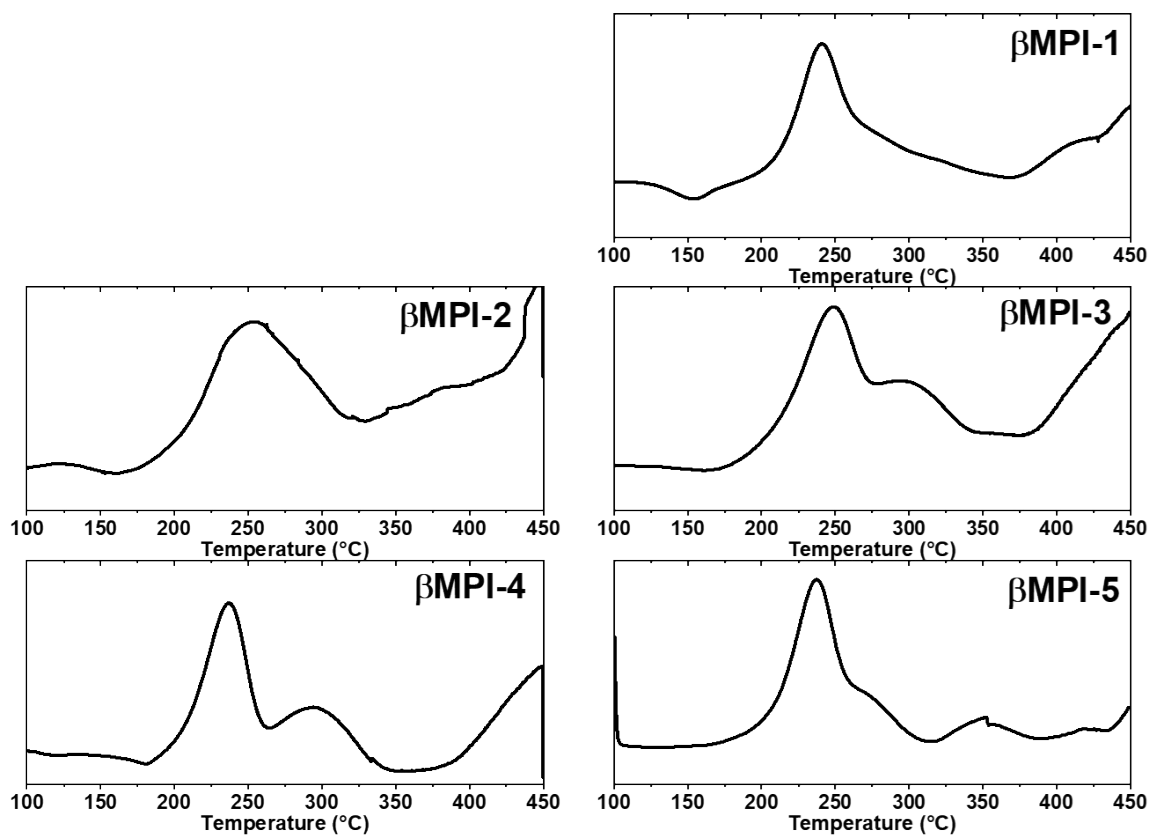

**Figure S10.** DSC based heat flow curves of  $\beta$ Mallyoxy-modified polyimide  $\beta$ MPI-1, -2, -3, -4, and -5.

**Table S1.** Determined physical properties glass-transition temperature  $T_g$ , TR onset temperature  $TR_{on}$ , TR conversion TR%, density, fractional free volume FFV of Allyl-,  $\alpha$ M-,  $\beta$ M-,  $\gamma$ M- and  $\gamma$ E-PI.

| <b>Modification</b>                   | <b><math>T_g</math><br/>(°C)</b> | <b><math>TR_{on}</math> (°C)</b> | <b>TR%<br/>(%)</b> | <b>Density (g/cm<sup>3</sup>)</b> | <b>FFV (%)</b> | <b><math>\Delta</math>Thickn<br/>ess (%)</b> |
|---------------------------------------|----------------------------------|----------------------------------|--------------------|-----------------------------------|----------------|----------------------------------------------|
| <b>Allyl-PI</b>                       | N.A.                             | 331                              |                    | 1.42±0.017                        | 17.3           |                                              |
| <b>Allyl-PI<br/>300 °C</b>            |                                  |                                  | 12.6               | 1.35±0.025                        | 20.6           | 5.47                                         |
| <b>Allyl-PI<br/>350 °C</b>            |                                  |                                  | 48.5               | 1.33±0.016                        | 20.9           | 7.39                                         |
| <b>Allyl-PI<br/>400 °C</b>            |                                  |                                  | 100                | 1.32±0.010                        | 20.9           | 4.31                                         |
| <b><math>\alpha</math>M-PI</b>        | 333                              | 328                              |                    | 1.41±0.010                        | 15.7           |                                              |
| <b><math>\alpha</math>M-PI 300 °C</b> |                                  |                                  | 13.0               | 1.36±0.001                        | 16.6           | 2.10                                         |
| <b><math>\alpha</math>M-PI 350 °C</b> |                                  |                                  | 62.1               | 1.35±0.007                        | 18.3           | 2.24                                         |
| <b><math>\alpha</math>M-PI 400 °C</b> |                                  |                                  | 100                | 1.32±0.007                        | 20.8           | 3.35                                         |
| <b><math>\beta</math>M-PI</b>         | 302                              | 325                              |                    | 1.40±0.018                        | 16.9           |                                              |
| <b><math>\beta</math>M-PI 300 °C</b>  |                                  |                                  | 14.6               | 1.35±0.016                        | 18.7           | 7.45                                         |
| <b><math>\beta</math>M-PI 300 °C</b>  |                                  |                                  | 22.2               | 1.34±0.022                        |                | 1.75                                         |
| <b><math>\beta</math>M-PI 350 °C</b>  |                                  |                                  | 84.8               | 1.31±0.013                        | 20.6           | 17.4                                         |
| <b><math>\beta</math>M-PI 400 °C</b>  |                                  |                                  | 100                | 1.31±0.013                        | 22.3           | 3.00                                         |
| <b><math>\gamma</math>M-PI</b>        | 289                              | 352                              |                    | 1.40±0.007                        | 15.9           |                                              |
| <b><math>\gamma</math>M-PI 300 °C</b> |                                  |                                  | 13.1               | 1.35±0.007                        | 19.1           | 9.26                                         |
| <b><math>\gamma</math>M-PI 350 °C</b> |                                  |                                  | 52.1               | 1.34±0.01                         | 18.1           | -1.60                                        |
| <b><math>\gamma</math>M-PI 400 °C</b> |                                  |                                  | 100                | 1.32±0.029                        | 20.8           | 8.42                                         |
| <b><math>\gamma</math>E-PI</b>        | 296                              | 309                              |                    | 1.41±0.009                        | 13.7           |                                              |



|                      |      |            |      |      |
|----------------------|------|------------|------|------|
| $\gamma$ E-PI 300 °C | 22.4 | 1.35±0.013 | 16.7 | 6.65 |
| $\gamma$ E-PI 350 °C | 100  | 1.33±0.005 | 16.5 | 13.2 |
| $\gamma$ E-PI 400 °C | 100  | 1.27±0.038 | 20.4 | 8.29 |

### X-Ray Diffraction Spectroscopy (XRD)

**Table S2.** Determined d-spacing of Allyl-,  $\alpha$ M-,  $\beta$ M-,  $\gamma$ M- and  $\gamma$ E-PI by means of x-ray diffraction spectroscopy, after annealing at 350 °C for 2 h and 400 °C for 1 h, respectively.

| Material       | d-spacing (2°)             |      |
|----------------|----------------------------|------|
|                | Annealing temperature (°C) |      |
|                | 350                        | 400  |
| HPI            | 0.67                       | 0.60 |
| AllyIPI-1      | 0.53                       | 0.54 |
| $\alpha$ MPI-1 |                            | 0.55 |
| $\beta$ MPI-1  | 0.55                       | 0.59 |
| $\gamma$ MPI-1 | 0.54                       | 0.51 |
| $\gamma$ EPI-1 | 0.57                       | 0.53 |

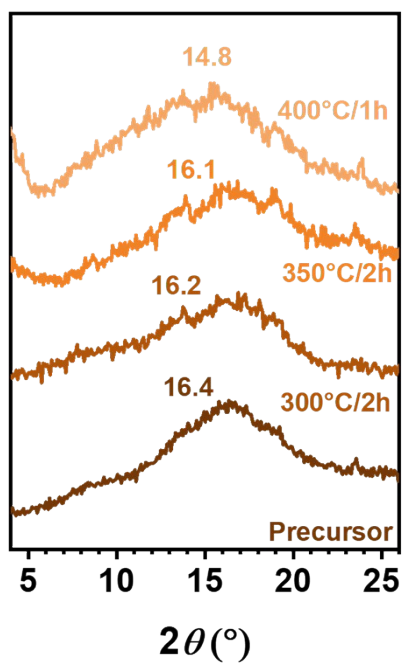

**Figure S11.** Determined diffraction pattern of  $\beta$ MPI-1 by means of x-ray diffraction spectroscopy, after annealing at 350 °C for 2 h and 400 °C for 1 h, respectively

### Gas Performance by means of Time-Lag Measurements

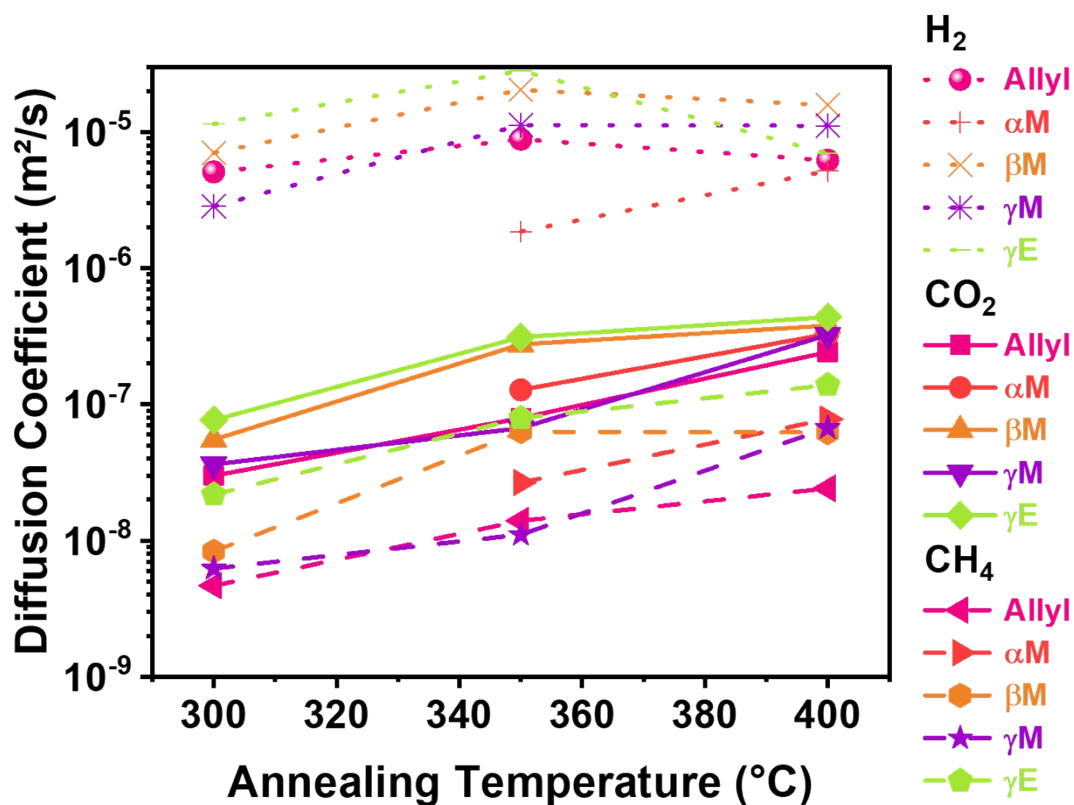

**Figure S12.** Diffusion coefficient as a function of the annealing temperature for different allyl derivatives for the gases H<sub>2</sub>, CO<sub>2</sub> and CH<sub>4</sub>.

**Table S3.** Overview of determined gas diffusion coefficients of He, H<sub>2</sub>, CO<sub>2</sub>, O<sub>2</sub>, N<sub>2</sub> and CH<sub>4</sub>.

| Material    | Annealing | Diffusion coefficient [10 <sup>-8</sup> cm <sup>2</sup> /s] |                |                 |                |                |                 |
|-------------|-----------|-------------------------------------------------------------|----------------|-----------------|----------------|----------------|-----------------|
|             |           | He                                                          | H <sub>2</sub> | CO <sub>2</sub> | O <sub>2</sub> | N <sub>2</sub> | CH <sub>4</sub> |
| Allyl-PI    | 300       | 200                                                         | 509            | 2.99            | 9.42           | 2.44           | 0.47            |
| βM-PI       |           | 680                                                         | 702            | 5.51            | 16.8           | 3.89           | 0.83            |
| γM-PI       |           | 554                                                         | 285            | 3.62            | 8.63           | 1.37           | 0.62            |
| γE-PI       |           | 593                                                         | 1147           | 7.68            | 26.8           | 7.96           | 2.17            |
| Cinnamyl-PI |           | 139                                                         | 85.2           | 1.14            | 5.71           | 2.33           | 0.04            |

|                    |                 |      |      |      |      |      |      |
|--------------------|-----------------|------|------|------|------|------|------|
| <i>Prenyl-PI</i>   |                 | 631  | 458  | 3.03 | 10.5 | 1.01 | 0.35 |
| <i>Butylene-PI</i> |                 | 196  | 108  | 4.89 | 10.9 | 4.07 | 1.25 |
| <i>Allyl-PI</i>    | <b>350</b>      | 2638 | 883  | 7.92 | 22.6 | 6.27 | 1.39 |
|                    |                 | 792  | 185  | 12.8 | 31.7 | 10.2 | 2.66 |
| $\beta$ M-PI       |                 | 3070 | 2050 | 27.5 | 78.5 | 11.2 | 6.30 |
| $\gamma$ M-PI      |                 | 4130 | 1126 | 6.69 | 13.4 | 5.20 | 1.10 |
| $\gamma$ E-PI      |                 | 5431 | 2825 | 31.2 | 75.8 | 29.9 | 7.92 |
| <i>Cinnamyl-PI</i> |                 | 1217 | 120  | 8.49 | 14.6 | 6.37 | 2.49 |
| <i>Prenyl-PI</i>   |                 |      | 1110 | 9.74 | 27.9 | 9.31 | 0.45 |
| <i>Butylene-PI</i> |                 | 1736 | 1471 | 8.19 | 24.1 | 6.65 | 1.18 |
| <i>Allyl-PI</i>    | <b>400</b>      | 210  | 621  | 24.2 | 25.9 | 5.95 | 2.41 |
| $\alpha$ M-PI      |                 | 491  | 518  | 32.9 | 59.9 | 22.2 | 7.78 |
| $\beta$ M-PI       |                 | 952  | 1580 | 37.9 | 72.8 | 21.9 | 6.21 |
| $\gamma$ M-PI      |                 | 507  | 1110 | 32.4 | 77.5 | 27.5 | 6.71 |
| $\gamma$ E-PI      |                 | 1850 | 696  | 43.8 | 94.4 | 23.8 | 13.9 |
| $\beta$ M-PI       | <b>150</b>      | 41.8 | 188  | 3.35 | 14.3 | 3.32 | 0.52 |
|                    | <b>300 1'</b>   |      | 1400 | 4.12 | 7.22 | 2.55 | 0.72 |
|                    | <b>300 30'</b>  | 680  | 702  | 5.51 | 16.8 | 3.89 | 0.83 |
|                    | <b>300 120'</b> | 228  | 1293 | 8.21 | 16.3 | 2.43 | 1.76 |
|                    | <b>350</b>      | 3070 | 2050 | 27.5 | 78.5 | 11.2 | 6.30 |
|                    | <b>400</b>      | 952  | 1580 | 37.9 | 72.8 | 21.9 | 6.21 |

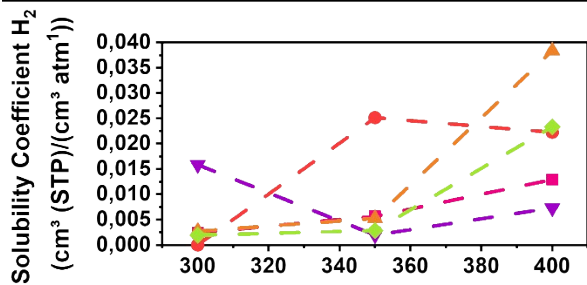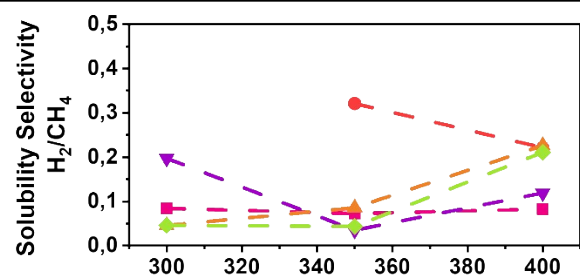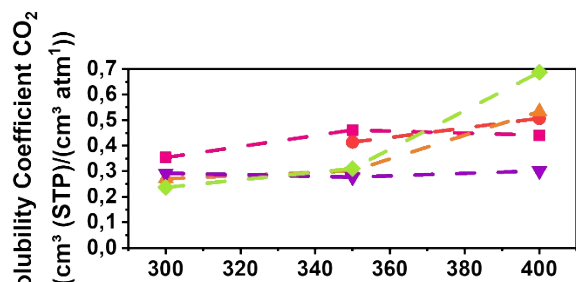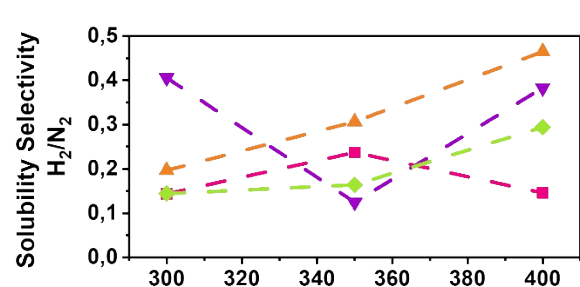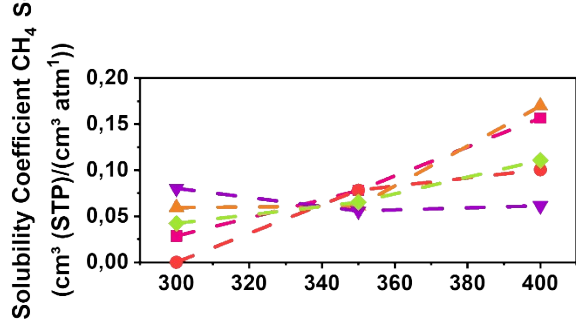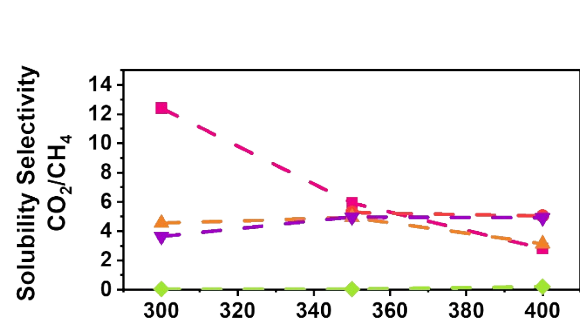

**Figure S13.** Gas solubility coefficient of He, H<sub>2</sub>, CO<sub>2</sub>, O<sub>2</sub>, N<sub>2</sub> and CH<sub>4</sub> and solubility-based selectivity of the gas pairs H<sub>2</sub>/CH<sub>4</sub>, H<sub>2</sub>/N<sub>2</sub> and CO<sub>2</sub>/CH<sub>4</sub> of the studied allyl derivatives after annealing at 300 °C for 30 min, 350 °C for 2 h and 400 °C for 1 h.

**Table S4.** Overview of determined gas solubility coefficients of He, H<sub>2</sub>, CO<sub>2</sub>, O<sub>2</sub>, N<sub>2</sub> and CH<sub>4</sub>.

|                 |                  | <b>Solubility coefficient [10<sup>-3</sup> cm<sup>3</sup> (STP) / (cm<sup>3</sup> atm<sup>1</sup>)]</b> |           |            |           |           |            |
|-----------------|------------------|---------------------------------------------------------------------------------------------------------|-----------|------------|-----------|-----------|------------|
| <b>Material</b> | <b>Annealing</b> | <b>He</b>                                                                                               | <b>H2</b> | <b>CO2</b> | <b>O2</b> | <b>N2</b> | <b>CH4</b> |
| Allyl-PI        | <b>300</b>       | 1,24                                                                                                    | 2,41      | 354        | 19,2      | 16,7      | 28,5       |
| βM-PI           |                  | 2,19                                                                                                    | 2,72      | 271        | 17,4      | 13,8      | 59,4       |
| γM-PI           |                  | 9,64                                                                                                    | 15,8      | 292        | 28,8      | 39,1      | 80,3       |
| γE-PI           |                  | 3,06                                                                                                    | 1,93      | 237        | 13,6      | 13,4      | 42,2       |
| Cinnamyl-PI     |                  | 0,001                                                                                                   | 0,0008    | 240        | 18,0      | 16,4      | 902        |
| Prenyl-PI       |                  | 2,46                                                                                                    | 3,09      | 279        | 17,7      | 41,0      | 105        |
| Butylene-PI     |                  | 9,07                                                                                                    | 12,9      | 245        | 23,9      | 22,5      | 51,2       |
| Allyl-PI        | <b>350</b>       | 1,61                                                                                                    | 5,66      | 461        | 26,0      | 23,8      | 77,9       |
| αM-PI           |                  | 9,18                                                                                                    | 25,1      | 413        | 31,8      | 26,2      | 78,3       |
| βM-PI           |                  | 2,38                                                                                                    | 5,26      | 302        | 21,6      | 17,1      | 61,2       |
| γM-PI           |                  | 0,49                                                                                                    | 1,95      | 277        | 16,9      | 15,6      | 55,7       |
| γE-PI           |                  | 0,99                                                                                                    | 2,84      | 3111       | 21,4      | 17,3      | 65,2       |
| Cinnamyl-PI     |                  | 0,001                                                                                                   | 0,001     | 293        | 38,0      | 35,9      | 78,4       |
| Prenyl-PI       |                  | 0,09                                                                                                    | 2,66      | 243        | 18,3      | 14,1      | 26,2       |
| Butylene-PI     |                  | 1,95                                                                                                    | 1,97      | 275        | 20,2      | 17,5      | 64,6       |
| Allyl-PI        | <b>400</b>       | 29,2                                                                                                    | 12,9      | 441        | 72,9      | 88,4      | 157        |
| αM-PI           |                  | 15,3                                                                                                    | 22,3      | 507        | 48,6      | 39,9      | 101        |
| βM-PI           |                  | 9,9                                                                                                     | 38,4      | 533        | 85,4      | 82,6      | 170        |
| γM-PI           |                  | 11,3                                                                                                    | 7,32      | 302        | 22,1      | 19,1      | 61,4       |
| γE-PI           |                  | 4,93                                                                                                    | 23,3      | 682        | 55,8      | 79,4      | 111        |
| βM-PI           | <b>150</b>       | 14,0                                                                                                    | 2,17      | 94,3       | 4,09      | 12,6      | 23,9       |

|         |      |      |     |      |      |      |
|---------|------|------|-----|------|------|------|
| 300 1'  | -    | 8,72 | 267 | 25,8 | 19,2 | 46,3 |
| 300 30' | 2,19 | 2,72 | 271 | 17,4 | 13,8 | 59,4 |
| 350     | 2,38 | 5,26 | 302 | 21,6 | 17,1 | 61,2 |
| 400     | 9,9  | 38,4 | 533 | 85,4 | 82,6 | 170  |

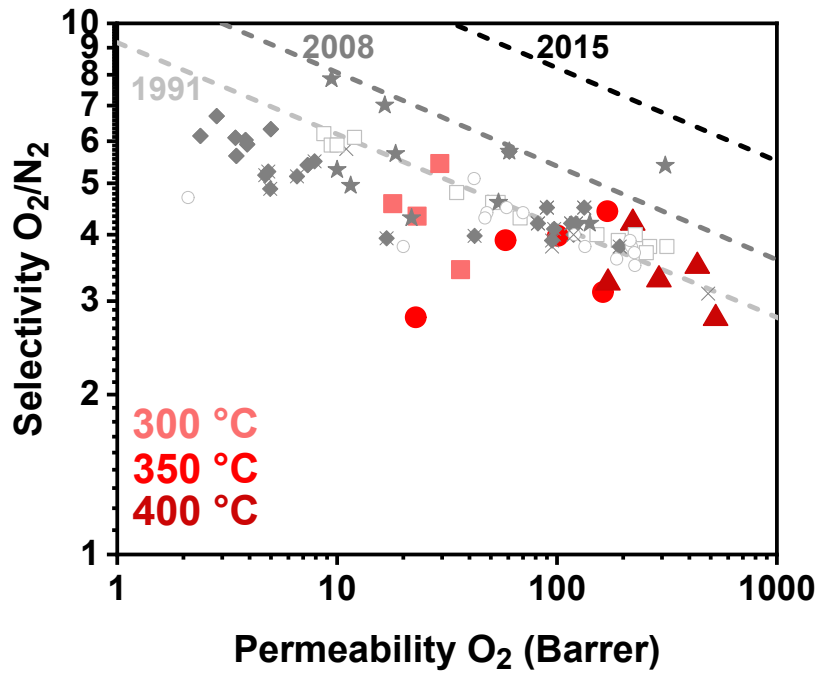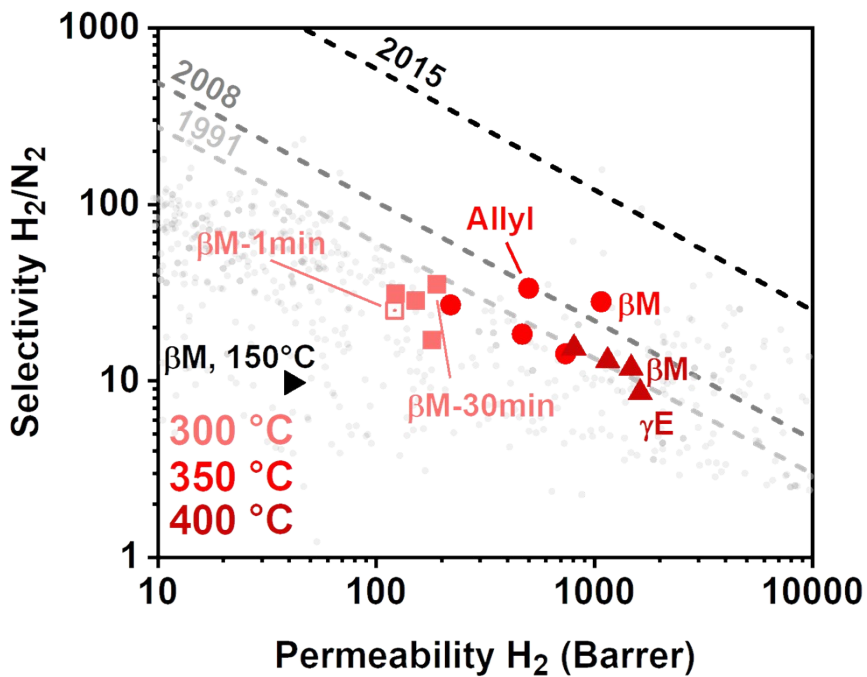

**Figure S14.** Gas pair selectivity vs gas permeability of O<sub>2</sub>/N<sub>2</sub> for different allyl derivatives after annealing at 300 °C for 0.5 h (■), 350 °C for 2 h (●) and 400 °C for 1 h (▲), incorporated in the upper bound plot, including upper bounds of 1991, 2008 and 2015 [4].

**Table S5.** Overview of determined gas permeability of He, H<sub>2</sub>, CO<sub>2</sub>, O<sub>2</sub>, N<sub>2</sub> and CH<sub>4</sub>.

| Material    | Annealing  | Permeability [Barrer] |                |                 |                |                |                 |
|-------------|------------|-----------------------|----------------|-----------------|----------------|----------------|-----------------|
|             |            | He                    | H <sub>2</sub> | CO <sub>2</sub> | O <sub>2</sub> | N <sub>2</sub> | CH <sub>4</sub> |
| Allyl-PI    | <b>300</b> | 247                   | 122            | 102             | 17.9           | 3.91           | 1.39            |
| βM-PI       |            | 180                   | 189            | 149             | 29.3           | 5.38           | 4.94            |
| γM-PI       |            | 151                   | 152            | 106             | 23.1           | 5.33           | 4.99            |
| γE-PI       |            | 167                   | 180            | 181             | 36.5           | 10.6           | 9.16            |
| Cinnamyl-PI |            | 95.8                  | 99.8           | 50.6            | 10.3           | 3.81           | 3.59            |
| Prenyl-PI   |            | 155                   | 141            | 84.5            | 18.5           | 4.13           | 3.63            |
| Butylene-PI |            | 142                   | 140            | 120             | 25.8           | 9.08           | 6.41            |
| Allyl-PI    | <b>350</b> | 423                   | 499            | 377             | 58.3           | 14.9           | 10.9            |
| αM-PI       |            | 727                   | 467            | 527             | 101            | 25.4           | 20.8            |
| βM-PI       |            | 728                   | 1075           | 831             | 169            | 38.3           | 38.2            |
| γM-PI       |            | 204                   | 219            | 185             | 22.8           | 8.15           | 6.14            |
| γE-PI       |            | 531                   | 739            | 968             | 162            | 51.9           | 51.6            |
| Cinnamyl-PI |            | 226                   | 269            | 249             | 55.1           | 22.8           | 19.2            |
| Prenyl-PI   |            | 271                   | 295            | 236             | 50.9           | 13.1           | 11.7            |
| Butylene-PI |            | 287                   | 289            | 225             | 48.5           | 11.6           | 7.19            |
| Allyl-PI    | <b>400</b> | 613                   | 803            | 1066            | 221            | 52.6           | 37.8            |
| αM-PI       |            | 752                   | 1151           | 1669            | 291            | 88.3           | 78.2            |
| βM-PI       |            | 944                   | 1475           | 1984            | 434            | 125            | 93.1            |
| γM-PI       |            | 575                   | 808            | 975             | 171            | 52.5           | 41.2            |
| γE-PI       |            | 913                   | 1624           | 3011            | 526            | 189            | 153             |
| βM-PI       | <b>150</b> | 58.7                  | 40.9           | 63.1            | 11.8           | 4.19           | 2.48            |
|             | <b>300</b> |                       | 122            | 110             | 18.6           | 4.86           | 3.23            |
|             | <b>300</b> | 180                   | 189            | 149             | 29.3           | 5.38           | 4.94            |
|             | <b>350</b> | 728                   | 1075           | 831             | 169            | 38.3           | 38.2            |
|             | <b>400</b> | 944                   | 1475           | 1984            | 434            | 125            | 93.1            |

**Table S6.** Overview of determined gas selectivity certain gas pairs.

| Material      | Annealing  | Selectivity                     |                                |                                 |                                |                                  |                                 |
|---------------|------------|---------------------------------|--------------------------------|---------------------------------|--------------------------------|----------------------------------|---------------------------------|
|               |            | H <sub>2</sub> /CO <sub>2</sub> | H <sub>2</sub> /N <sub>2</sub> | H <sub>2</sub> /CH <sub>4</sub> | O <sub>2</sub> /N <sub>2</sub> | CO <sub>2</sub> /CH <sub>4</sub> | CO <sub>2</sub> /N <sub>2</sub> |
| Allyl-PI      | <b>300</b> | 1.20                            | 31.3                           | 88.2                            | 4.6                            | 51                               | 26.1                            |
| $\beta$ M-PI  |            | 1.27                            | 35.2                           | 38.4                            | 5.4                            | 30.2                             | 27.7                            |
| $\gamma$ M-PI |            | 1.44                            | 28.5                           | 30.5                            | 4.3                            | 21.2                             | 19.9                            |
| $\gamma$ E-PI |            | 0.99                            | 16.9                           | 19.7                            | 3.4                            | 19.8                             | 17.1                            |
| Cinnamyl-PI   |            | 1.97                            | 26.2                           | 27.8                            | 2.7                            | 14.1                             | 13.3                            |
| Prenyl-PI     |            | 1.68                            | 34.2                           | 38.9                            | 4.5                            | 23.3                             | 20.5                            |
| Butylene-PI   |            | 1.17                            | 15.4                           | 21.8                            | 2.8                            | 18.6                             | 13.2                            |
| Allyl-PI      | <b>350</b> | 1.32                            | 33.4                           | 45.9                            | 3.9                            | 34.7                             | 25.3                            |
| $\alpha$ M-PI |            | 0.89                            | 18.4                           | 22.4                            | 4.0                            | 25.3                             | 20.8                            |
| $\beta$ M-PI  |            | 1.29                            | 28.1                           | 28.2                            | 4.4                            | 21.8                             | 21.7                            |
| $\gamma$ M-PI |            | 1.18                            | 26.9                           | 35.7                            | 2.8                            | 30.2                             | 22.7                            |
| $\gamma$ E-PI |            | 0.76                            | 14.2                           | 14.3                            | 3.1                            | 18.8                             | 18.7                            |
| Cinnamyl-PI   |            | 1.08                            | 11.8                           | 13.8                            | 2.4                            | 12.8                             | 10.9                            |
| Prenyl-PI     |            | 1.25                            | 22.6                           | 25.3                            | 3.9                            | 20.2                             | 18.1                            |
| Butylene-PI   |            | 1.29                            | 24.9                           | 40.2                            | 4.2                            | 31.3                             | 19.4                            |
| Allyl-PI      | <b>400</b> | 0.75                            | 15.3                           | 21.2                            | 4.2                            | 28.2                             | 20.3                            |
| $\alpha$ M-PI |            | 0.69                            | 13.0                           | 14.7                            | 3.3                            | 21.3                             | 18.9                            |
| $\beta$ M-PI  |            | 0.74                            | 11.8                           | 15.8                            | 3.5                            | 21.3                             | 15.9                            |
| $\gamma$ M-PI |            | 0.83                            | 15.4                           | 19.6                            | 3.2                            | 23.7                             | 18.6                            |
| $\gamma$ E-PI |            | 0.54                            | 8.6                            | 10.6                            | 2.8                            | 19.6                             | 15.9                            |
| $\beta$ M-PI  | <b>150</b> | 0.65                            | 9.8                            | 16.5                            | 2.8                            | 25.5                             | 15.0                            |
|               | <b>300</b> | 1.10                            | 25.0                           | 37.7                            | 3.8                            | 34.0                             | 22.7                            |
|               | <b>300</b> | 1.27                            | 35.2                           | 38.4                            | 5.4                            | 30.2                             | 27.7                            |
|               | <b>350</b> | 1.29                            | 28.1                           | 28.2                            | 4.4                            | 21.8                             | 21.7                            |
|               | <b>400</b> | 0.74                            | 11.8                           | 15.8                            | 3.5                            | 21.3                             | 15.9                            |



**Table S7.** Overview of determined gas diffusion coefficients of ethylene, ethane, propylene and propane.

| Diffusion coefficient [ $10^{-8}$ cm <sup>2</sup> /s] |           |      |      |      |       |
|-------------------------------------------------------|-----------|------|------|------|-------|
| Material                                              | Annealing | C2H4 | C2H6 | C3H6 | C3H8  |
| Allyl-PI                                              | 400       | 1.18 | 0.35 | 0.21 | 0.019 |
| $\alpha$ M-PI                                         |           | 2.11 | 0.72 | 0.46 | 0.049 |
| $\beta$ M-PI                                          |           | 4.00 | 1.28 | 0.98 | 0.06  |
| $\gamma$ E-PI                                         |           | 3.8  | 1.19 | 0.74 | 0.057 |

**Table S8.** Overview of determined gas solubility coefficients of ethylene, ethane, propylene and propane.

| Solubility coefficient [ $10^{-3}$ cm <sup>3</sup> (STP) / (cm <sup>3</sup> atm <sup>1</sup> )] |           |      |      |      |      |
|-------------------------------------------------------------------------------------------------|-----------|------|------|------|------|
| Material                                                                                        | Annealing | C2H4 | C2H6 | C3H6 | C3H8 |
| Allyl-PI                                                                                        | 400       | 524  | 741  | 1694 | 1493 |
| $\alpha$ M-PI                                                                                   |           | 660  | 817  | 1650 | 1246 |
| $\beta$ M-PI                                                                                    |           | 593  | 879  | 1257 | 1019 |
| $\gamma$ E-PI                                                                                   |           | 859  | 1271 | 2794 | 2617 |

**Table S9.** Overview of determined gas permeability of ethylene, ethane, propylene and propane.

| Permeability [Barrer] |           |      |      |      |      |
|-----------------------|-----------|------|------|------|------|
| Material              | Annealing | C2H4 | C2H6 | C3H6 | C3H8 |
| Allyl-PI              | 400       | 61.5 | 25.5 | 35.5 | 2.88 |
| $\alpha$ M-PI         |           | 139  | 59.0 | 76.0 | 6.15 |
| $\beta$ M-PI          |           | 237  | 113  | 123  | 6.16 |
| $\gamma$ E-PI         |           | 327  | 151  | 207  | 14.9 |

**Table S10.** Overview of determined gas selectivity certain gas pairs.

| Selectivity   |           |               |               |
|---------------|-----------|---------------|---------------|
| Material      | Annealing | C2H4/<br>C2H6 | C3H6/<br>C3H8 |
| Allyl-PI      | 400       | 2.4           | 12.3          |
| $\alpha$ M-PI |           | 2.4           | 12.4          |
| $\beta$ M-PI  |           | 2.1           | 19.9          |
| $\gamma$ E-PI |           | 2.2           | 13.9          |

## Computational Chemistry

### Quantum mechanical Simulation

#### *Geometry optimized Structures*

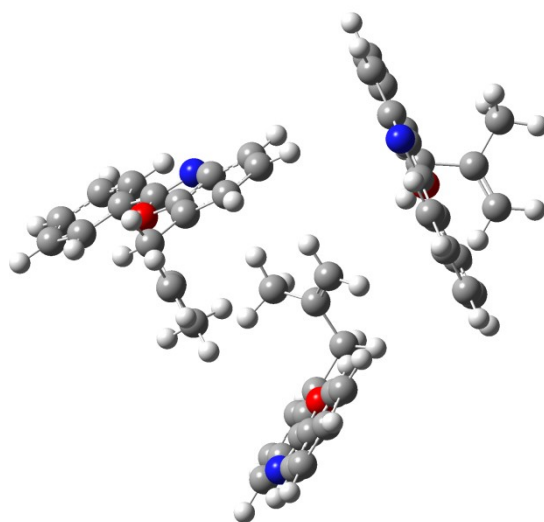

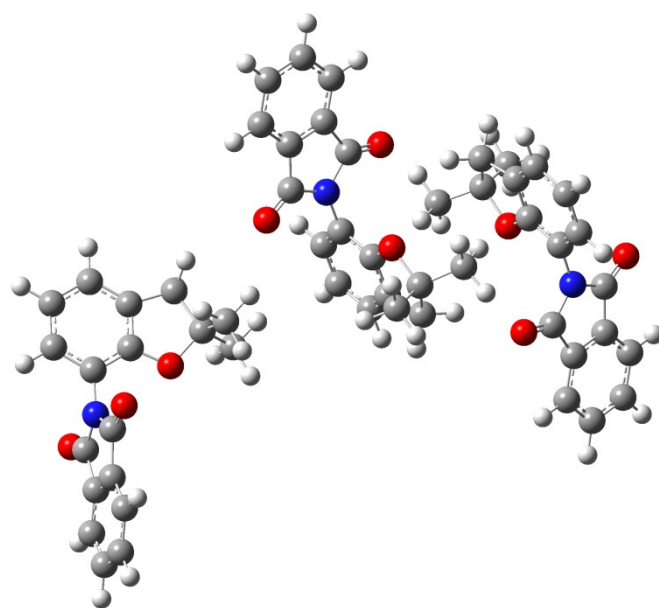

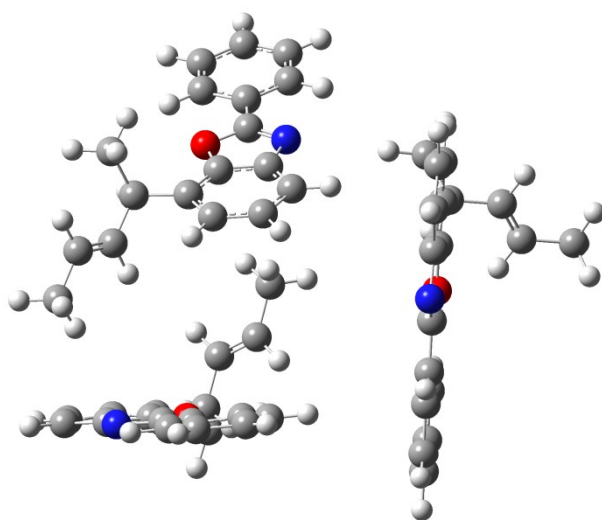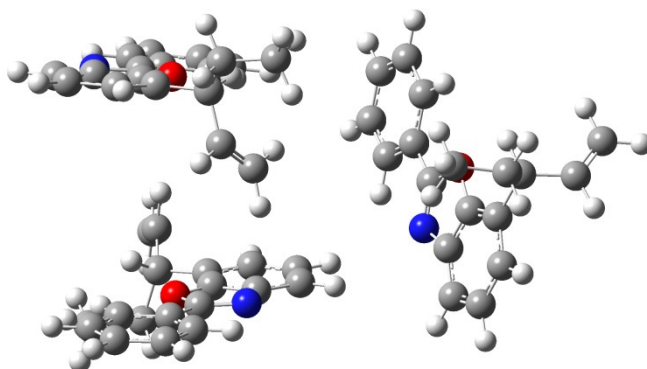

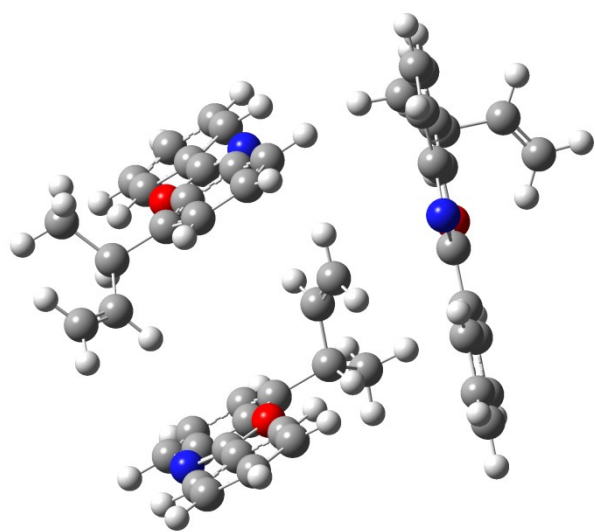

**Figure S15.** Geometry optimized structures of three models of each allyl derivative.

*Potential energy surface scan*

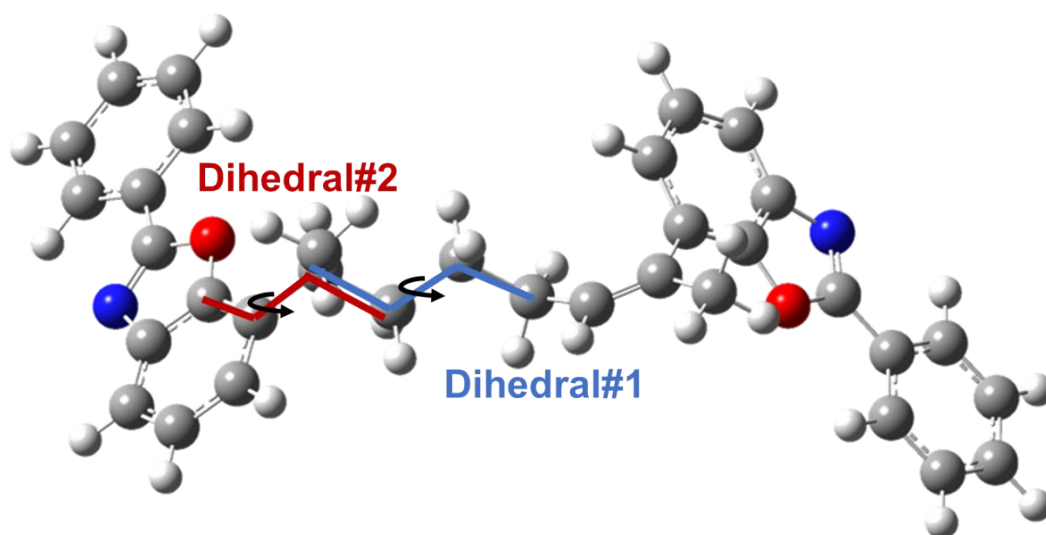

**Figure S16.** Visualization of the investigated dihedral angle of the studied allyl derivatives.

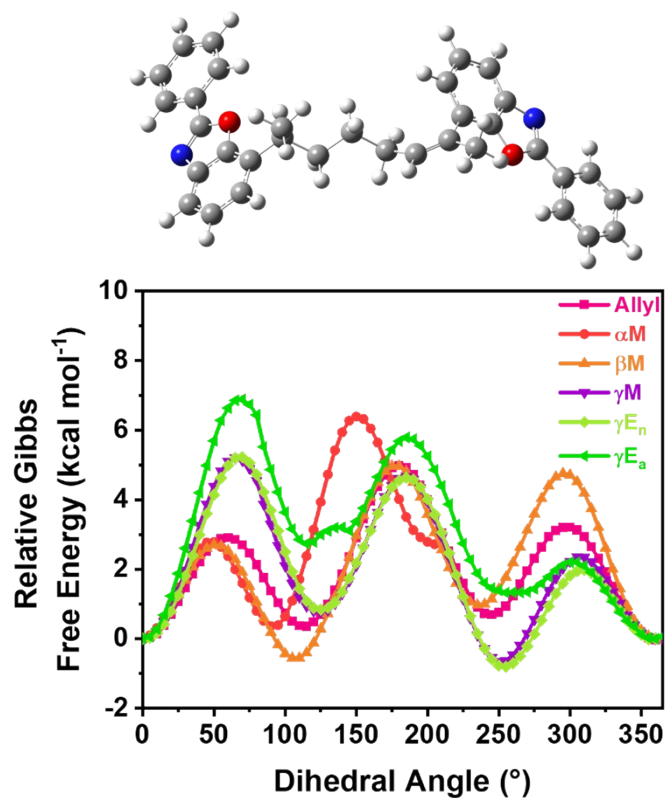

**Figure S17.** PES scan of the dihedral angle (red mark up) of Allyl-PBO (left), PES scan of the dihedral angle of allylderivatives βM-PBO, γM-PBO, γEn-PBO and γEa-PBO.

## Molecular Modelling

### Method

The polymer models were built from previously constructed and optimized single repetition units. The prepared polymer models were also optimized by an energy minimization step.

From these optimized polymer models several amorphous cells were constructing, following the Theodorou/Suter method, which is implemented in the Amorphous Cell module of Materials Studio. Every cell was constructed from two polymer chains, each containing 40 repetition units, with a total of 6564 atoms (in the case of  $\gamma$ M-PI) at an initial density of  $0.1 \text{ g cm}^{-3}$  at 303 K under periodic boundary conditions. The final packing of the cell at the final density was obtained after a compression-decompression procedure (Table S8) [5]. This relaxation and equilibration method is described more in detail in the support information. A long final NpT-MD runs was carried out to equilibrate the model. A validity check was done by varifying a stable energy and density after long MD runs. In order to check the quality of the boxes the ratio of the accessible volume (AV) to accessible solvent surface (ASA) and its gradient by varying the probe radius from 1.0 to 2.0 Å with steps of 0.1 Å was done [6, 7]. The final cell size of the packing models was about  $(40\text{Å})^3$

**Table S11.** Overview of the compression-decompression-relaxations procedure to generate amorphous cells.

| Step# | Temperature (K) | Pressure (GPa) | Time (ps) | Ensemble |
|-------|-----------------|----------------|-----------|----------|
| 1     | 600             |                | 50        | NVT      |
| 2     | 303             |                | 50        | NVT      |
| 3     | 303             | 0.003          | 50        | NPT      |
| 4     | 600             |                | 50        | NVT      |
| 5     | 303             |                | 100       | NVT      |

|              |     |        |     |     |
|--------------|-----|--------|-----|-----|
| <b>6</b>     | 303 | 0.05   | 50  | NPT |
| <b>7</b>     | 600 |        | 50  | NVT |
| <b>8</b>     | 303 |        | 100 | NVT |
| <b>9</b>     | 303 | 0.3    | 50  | NPT |
| <b>10</b>    | 600 |        | 50  | NVT |
| <b>11</b>    | 303 |        | 100 | NVT |
| <b>12</b>    | 303 | 0.15   | 5   | NPT |
| <b>13</b>    | 600 |        | 5   | NVT |
| <b>14</b>    | 303 |        | 10  | NVT |
| <b>15</b>    | 303 | 0.06   | 5   | NPT |
| <b>16</b>    | 600 |        | 5   | NVT |
| <b>17</b>    | 303 |        | 10  | NVT |
| <b>18</b>    | 303 | 0.0001 | 5   | NPT |
| <b>19</b>    | 600 |        | 5   | NVT |
| <b>20</b>    | 303 |        | 10  | NVT |
| <b>21</b>    | 303 | 0.0001 | 300 | NPT |
| <b>Final</b> | 303 |        | 500 | NVT |

The subsequent crosslinking procedure was developed by a set of crosslinking reactions between corresponding allyl groups followed by a geometry optimization and a 30ps NPT and 30ps NVT MD-run. The procedure was repeated until no crosslinking allyl groups were found within the pre-specified cut-off distance of 5Å. The scheme is demonstrated in the support information.

The analysis of the structure properties, such as the torsional distribution, length distribution of certain subunits, as well as the mean-square displacement (MSD) was done by means of long 1ns-MD runs with a NVT-ensemble at 600 K and 303K with a time-step of 1 femtosecond. The temperature control was performed by using a Nosé thermostat.



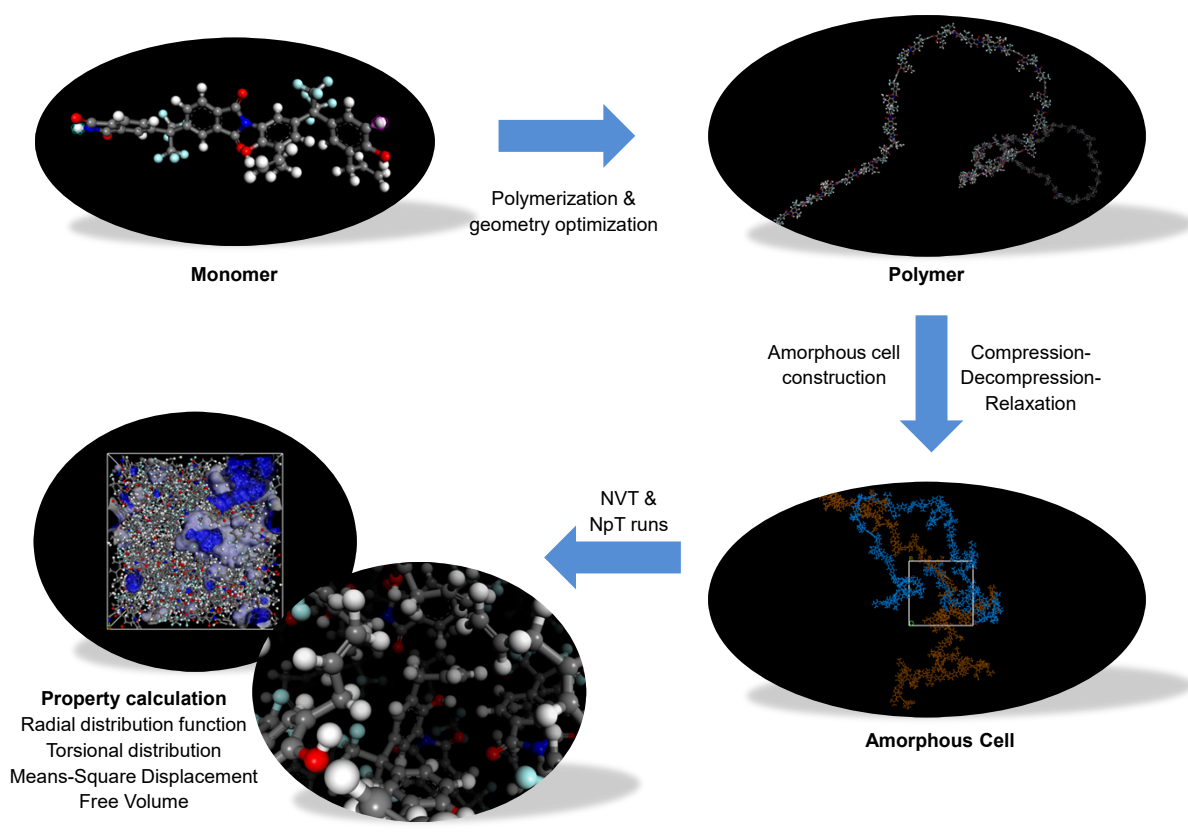

**Scheme S3:** Amorphous cell development procedure including (1) monomer creation and optimization, (2) polymer building, (3) amorphous cell packing followed by a 21step procedure including compression-decompression-relaxation and equilibration runs, (4) analytics via long NVT or NpT-runs.

**The free volume analysis** was performed using the visualizer tool of materials studio. The free accessible volume (FAV), defined by the cell volume  $V$  and the probe accessible volume  $V_{probe}$ , was determined by the ratio as show in equation

$$FAV (\%) = \frac{V - V_{Probe}}{V} \times 100$$

**Table S12.** Overview of determined parameter and properties obtained by molecular modelling simulations.

| <b>Code</b>       | <b>Atom#</b> | <b>Crosslinks</b> | <b>Density</b> |
|-------------------|--------------|-------------------|----------------|
| <b>Allyl</b>      | 4624         | 0                 | 1.354±0.005    |
| <b>Allyl10cx</b>  | 4624         | 10                | 1.362±0.012    |
| <b>Allyl20cx</b>  | 4624         | 20                | 1.351±0.009    |
| <b>Allyl33cx</b>  | 4624         | 33                | 1.361±0.014    |
| <b>αM-PI</b>      | 5020         | 0                 | 1.356±0.007    |
| <b>αM-PI10cx</b>  | 5020         | 10                | 1.343±0.001    |
| <b>αM-PI20cx</b>  | 5020         | 20                | 1.337±0.009    |
| <b>αM-PI27cx</b>  | 5020         | 27                | 1.331±0.001    |
| <b>βM-PI</b>      | 5020         | 0                 | 1.358±0.005    |
| <b>βM-PI10cx</b>  | 5020         | 10                | 1.322±0.024    |
| <b>βM-PI20cx</b>  | 5020         | 20                | 1.331±0.012    |
| <b>βM-PI26cx</b>  | 5020         | 26                | 1.335±0.014    |
| <b>PBF- βM-PI</b> | 5020         | 0                 | 1.349±0.003    |
| <b>γM-PI</b>      | 5020         | 0                 | 1.347±0.001    |
| <b>γM-PI10cx</b>  | 5020         | 10                | 1.319±0.000    |
| <b>γM-PI20cx</b>  | 5020         | 20                | 1.320±0.001    |
| <b>γM-PI29cx</b>  | 5020         | 29                | 1.308±0.000    |
| <b>γE-PI</b>      | 5416         | 0                 | 1.349±0.004    |
| <b>γE-PI10cx</b>  | 5416         | 10                | 1.258±0.041    |
| <b>γE-PI20cx</b>  | 5416         | 20                | 1.289±0.019    |
| <b>γE-PI26cx</b>  | 5416         | 26                | 1.302±0.013    |
| <b>γEa-PI</b>     | 5416         | 0                 | 1.345±0.008    |
| <b>γEa-PI10cx</b> | 5416         | 10                | 1.288±0.012    |

|                    |      |    |             |
|--------------------|------|----|-------------|
| $\gamma$ Ea-PI20cx | 5416 | 20 | 1.301±0.005 |
| $\gamma$ Ea-PI21cx | 5416 | 21 | 1.252±0.050 |

**Table S13.** Overview of free volume analysis of  $\beta$ M-PI.

| Code               | Crosslinks | Density       | Free Volume (%) | Free Volume/<br>Connolly Surface (Å) |
|--------------------|------------|---------------|-----------------|--------------------------------------|
| $\beta$ M-PI       | 0          | 1.358±0.005   | 23.58±0.36      | 0.76±0.019                           |
| $\beta$ M-PI10cx   | 10         | 1.322±0.024   | 25.73±1.82      | 0.88±0.006                           |
| $\beta$ M-PI20cx   | 20         | 1.331±0.012   | 25.85±2.38      | 0.87±0.031                           |
| $\beta$ M-PI26cx   | 26±1       | 1.335±0.014   | 25.62±1.83      | 0.84±0.0006                          |
| CyCx- $\beta$ M-PI | 26±1       | 1.331 ± 0.011 | 26.58±0.006     | 0.83±0.014                           |
| (TCM) $\beta$ M-PI | 26±1       | 1.313±0.016   | 26.77±0.010     | 0.81±0.04                            |
| (TCM) $\beta$ M-PI | 26±1       | 1.298 ± 0.013 | 27.44±0.009     | 0.81±0.027                           |
| (TCM) $\beta$ M-PI | 26±1       | 1.270±0.007   | 28.14±0.006     | 0.83±0.023                           |
| PBF- $\beta$ M-PI  | 0          | 1.349±0.003   | 25.63±0.295     | 0.79±0.021                           |

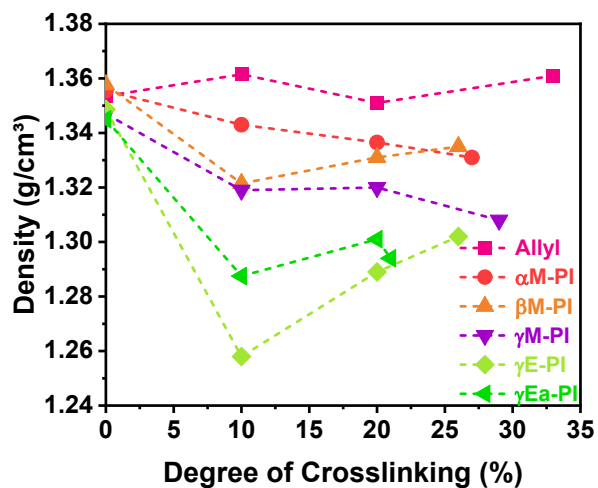

**Figure S18.** Free volume elements with an increasing number of crosslinks and a depiction of the density as a function of the degree of crosslinking of all allyl derivatives (left).

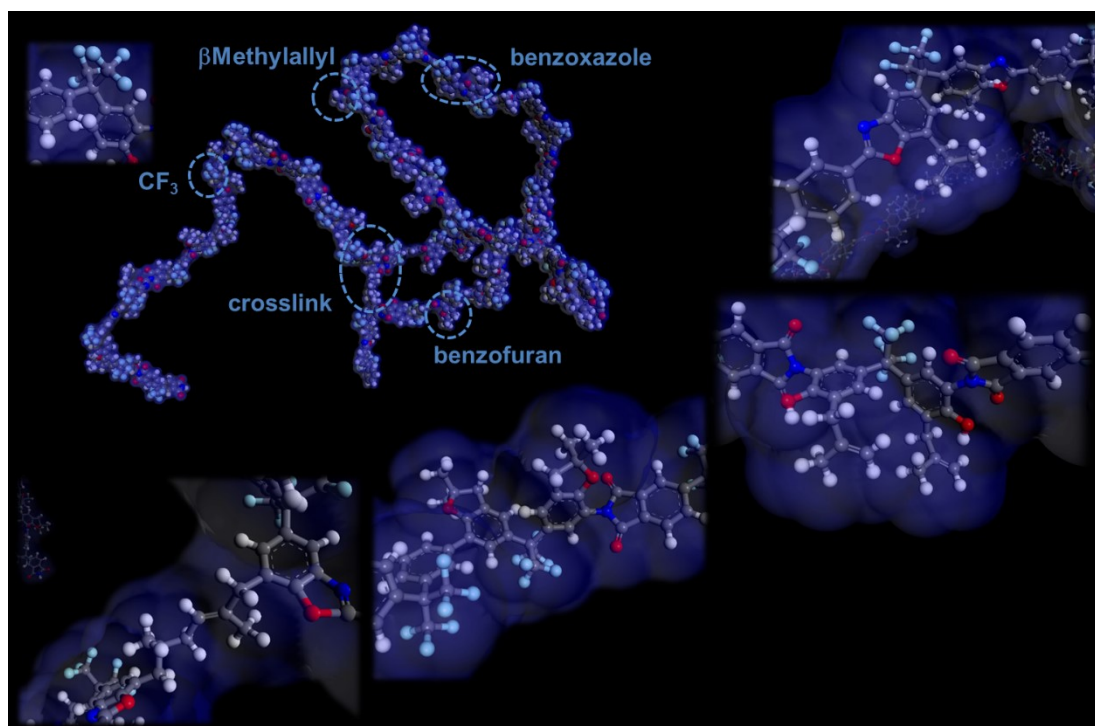

**Figure S19.**  $\beta$ M-PI polymer chain containing benzofuran, Claisen-Rearranged, crosslinked and thermally rearranged units.

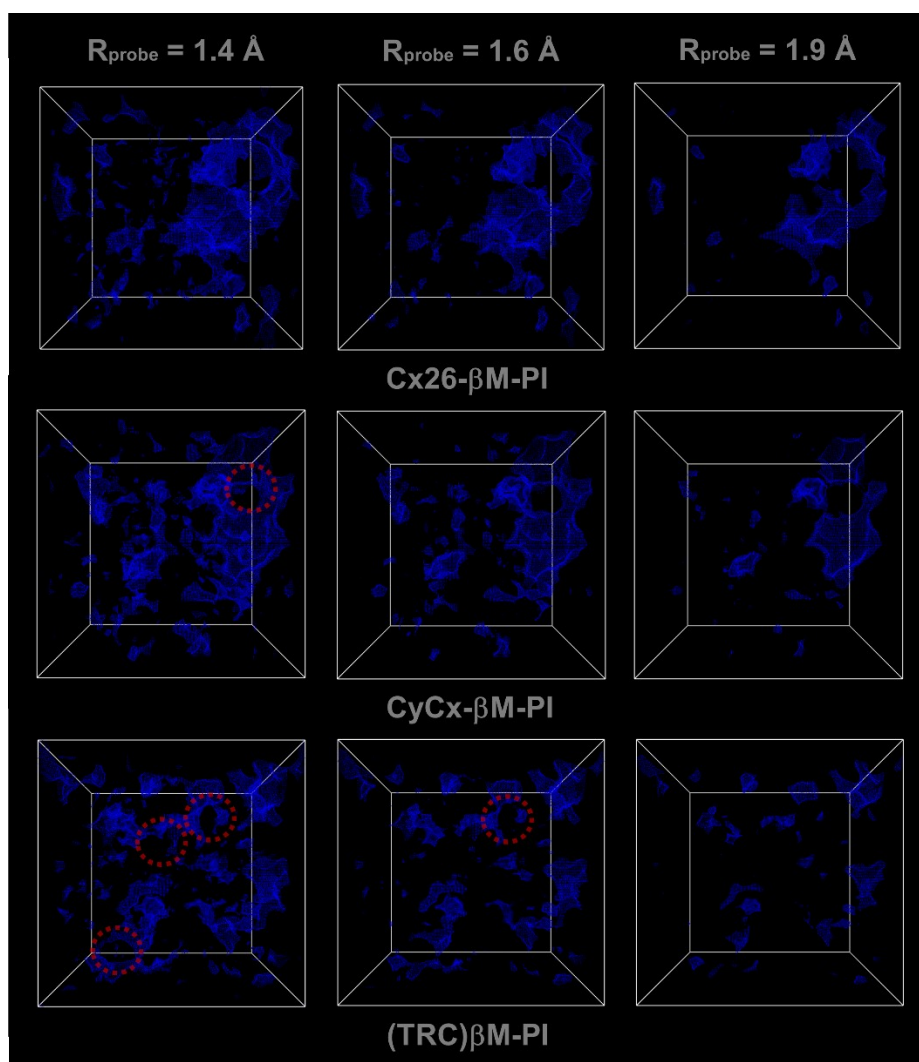

**Figure S20.** Accessible free volume at a probe radius of 1.4 Å (left), 1.6 Å (middle) and 1.9 Å (right) is shown for CyCx-βM-PI (top row) and (TRC)βM-PI (bottom row).

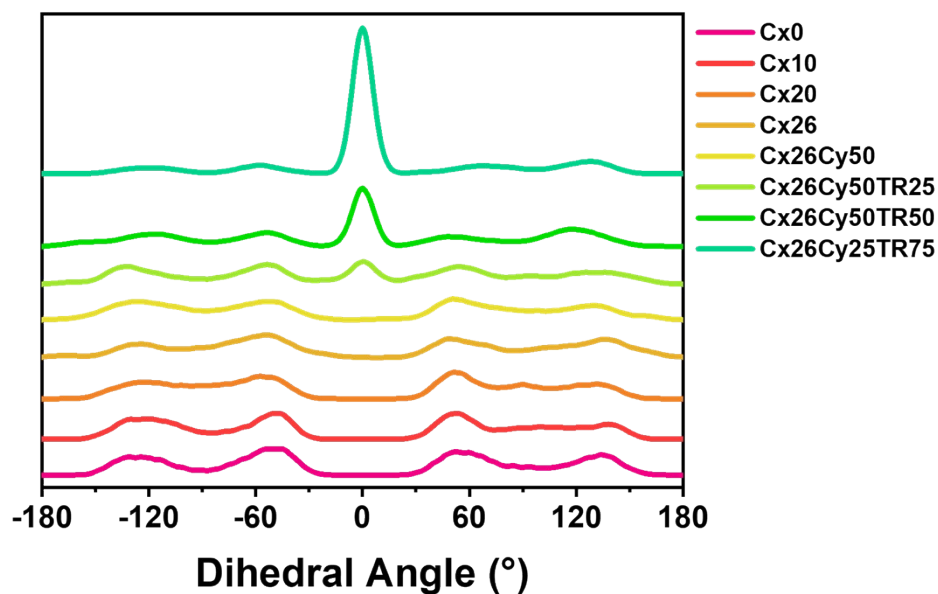

**Figure S21.** Torsion distribution for the imide-phenol dihedral torsion with increasing degree of crosslinking (0-26) and CyCx- $\beta$ M-PI, (TCR) $\beta$ M-PI with 25, 50 and 75% HPI-to-PBO conversion.

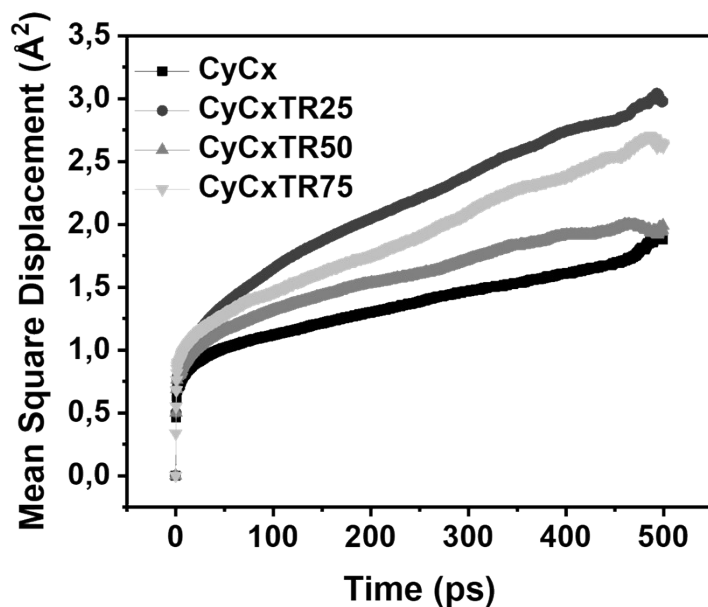

**Figure S22.** Mean-Square Displacement for CyCx- $\beta$ M-PI, (TCR) $\beta$ M-PI with 25, 50 and 75% of HPI-to-PBO conversion.

## References

1. Bondi, A., *van der Waals Volumes and Radii*. The Journal of Physical Chemistry, 1964. **68**(3): p. 441-451.
2. Park, J.Y. and D.R. Paul, *Correlation and prediction of gas permeability in glassy polymer membrane materials via a modified free volume based group contribution method*. Journal of Membrane Science, 1997. **125**(1): p. 23-39.
3. Shishatskii, A.M., Y.P. Yampol'skii, and K.V. Peinemann, *Effects of film thickness on density and gas permeation parameters of glassy polymers*. Journal of Membrane Science, 1996. **112**(2): p. 275-285.
4. Swaidan, R., B. Ghanem, and I. Pinnau, *Fine-Tuned Intrinsically Ultramicroporous Polymers Redefine the Permeability/Selectivity Upper Bounds of Membrane-Based Air and Hydrogen Separations*. ACS Macro Letters, 2015. **4**(9): p. 947-951.
5. Larsen, G.S., et al., *Molecular Simulations of PIM-1-like Polymers of Intrinsic Microporosity*. Macromolecules, 2011. **44**(17): p. 6944-6951.
6. Park, C.H., et al., *A simulation study on OH-containing polyimide (HPI) and thermally rearranged polybenzoxazoles (TR-PBO): relationship between gas transport properties and free volume morphology*. J Phys Chem B, 2014. **118**(10): p. 2746-57.
7. Park, C.H., et al., *Thermal treatment effect on the structure and property change between hydroxy-containing polyimides (HPIs) and thermally rearranged polybenzoxazole (TR-PBO)*. J Phys Chem B, 2012. **116**(42): p. 12864-77.
